# 1 **Dichaete, a Sox2 homologue, prevents activation of cell death in multiple developmental** 2 **contexts**

3 Katherine Harding, Katerina Heath & Kristin White

4 Cutaneous Biology Research Center - Massachusetts General Hospital, Harvard Medical School,  
5 Boston, MA, 02129 USA

6

## 7 **ABSTRACT**

8 Precisely regulated cell death plays a critical role in normal development and is controlled by the  
9 balance of pro-apoptotic and anti-apoptotic signals. In *Drosophila*, transcription of the clustered cell  
10 death activators *grim* and *reaper* is turned on in the developing nervous system to eliminate neural  
11 stem cells at the end of embryonic development. This transcription is activated by a pulse of the Hox  
12 gene *abdominal-A*. We show here that the Sox2 homologue *Dichaete* inhibits neural stem cell death  
13 when overexpressed, and loss of *Dichaete* promotes premature neural stem cell death. The anti-  
14 apoptotic activity of *Dichaete* opposes the pro-apoptotic factors *abdominal-A*, as well as the  
15 transcription factor *grainyhead*. The function of all three genes impinge on an enhancer that regulates  
16 the transcription of *grim* and *reaper*. Furthermore, we find that the balance between *abdominal-A* and  
17 *Dichaete* is likely to regulate the death of other cells during development, including cells in the  
18 developing midline, the developing hindgut, and in the early abdominal epidermis. Loss of *Dichaete*  
19 results in premature death in these tissues. This death can be rescued by the deletion of the enhancer  
20 region between *grim* and *reaper*. These data suggest that *Dichaete* functions to inhibit cell death  
21 activated by *abdominal-A* in multiple developmental contexts.

22

## 23 **INTRODUCTION**

24 Programmed cell death is a critical element of normal development, with a notable role in shaping  
25 the nervous system. Apoptosis-deficient *Drosophila* mutants display reduced adult viability and a  
26 massively overgrown central nervous system due to disruption of the endogenous pattern of neural  
27 stem cell apoptosis (White et al, 1994; Tan et al, 2011). Similarly, a complete block in intrinsically  
28 activated apoptosis in mouse development, due to a triple knockout of the pro-apoptotic proteins BAX,  
29 BAK and BOK, results in lower than 2% survival to weaning and an expansion of multiple hippocampal  
30 layers during embryogenesis (Ke et al, 2018), suggesting that developmentally regulated apoptosis is  
31 required for organismal viability and normal brain development in vertebrates as well as *Drosophila*. As  
32 programmed cell death is an irreversible cellular behavior, the activation of this cell fate program must  
33 be under extremely tight regulatory control to avoid spurious activation. However, the organismal

34 consequences of not activating cell death in the appropriate context are also dire, as this can lead to  
35 developmental defects or accumulation of transformed and malignant cells. Understanding how cell  
36 death is selectively and accurately activated in the appropriate context is therefore critical to our  
37 understanding of nervous system development.

38 We investigated the role of *Dichaete*, the *Drosophila* homologue of Sox2, in the regulation of  
39 neural stem cell death. Expression of mouse Sox2 is able to rescue phenotypes of *Dichaete* mutant  
40 embryos, indicating that these proteins are functionally conserved (Sánchez Soriano & Russell, 1998).  
41 Many lines of evidence have outlined critical roles for both *Dichaete* and Sox2 in neural development,  
42 but the consequences of loss of function of these proteins remain unclear. In early mammalian  
43 embryonic development, the transcription factor Sox2 is required for derivation of both the  
44 trophoctoderm and inner cell mass in blastocysts (Avilion et al, 2003; Keramari et al, 2010; reviewed in  
45 Sarkar & Hochedlinger 2013). As Sox2-null embryos are therefore lethal prior to the generation of more  
46 differentiated tissues, hypomorphic and conditional knock-out alleles have been deployed to reveal  
47 functions for Sox2 in post-implantation development. During mammalian fetal development, Sox2 is  
48 primarily expressed in the neuroectoderm and gut endoderm, as well as the developing pharyngeal  
49 arches and germ cells (Sarkar & Hochedlinger 2013). Post-natal survival can be achieved in  
50 heterozygous mutant mice that express Sox2 protein at 25-30% of the wild type levels (Ferri et al,  
51 2004). These adult mutant mice display pronounced neural phenotypes, including loss of cortical tissue  
52 associated with neurodegeneration and accumulation of intraneuronal aggregates (Ferri et al, 2004).  
53 The degenerating neurons in these Sox2-deficient brains display the hallmark characteristics of  
54 apoptotic cells, including condensed nuclei, hyperchromatic nuclear and intracellular staining, and  
55 membrane blebbing (Ferri et al, 2004). Similarly, neural-specific deletion of Sox2 during embryogenesis  
56 results in loss of neural stem cell populations by postnatal day 7, and this cell loss is associated with  
57 increased apoptosis throughout the dentate gyrus where post-embryonic neural stem cells are located  
58 (Favaro et al, 2009). Despite these observed links between Sox2 deficiency and apoptosis in neural  
59 stem cells, the role of cell death in driving Sox2 mutant phenotypes has remained elusive due to the  
60 difficulty in blocking apoptotic death in these animals.

61 The *Drosophila* homologue of Sox2, *Dichaete*, plays a similar role in neural development. It is  
62 highly expressed in the ventral neuroectoderm during embryonic development, and *Dichaete*-null  
63 alleles are embryonic lethal (Nambu & Nambu 1996; Sánchez Soriano & Russell, 1998). *Dichaete*  
64 mutant embryos display segmentation errors and significant defects in central nervous system  
65 development (Nambu & Nambu 1996; Sánchez Soriano & Russell, 1998). Previous mechanisms for  
66 these defects have been proposed, including a transcriptional role for *Dichaete* in specifying both

67 midline glia and neural stem cell populations within the nervous system (Nambu & Nambu 1996;  
68 Sánchez Soriano & Russell, 1998; Ma et al, 2000; Zhao & Skeath 2002; Overton et al, 2002). However,  
69 as with mammalian phenotypes, the role of apoptotic cell death following *Dichaete* loss of function has  
70 not been investigated. Previous studies have suggested a role for *Dichaete* in regulating apoptosis:  
71 overexpression of *Dichaete* within the larval central nervous system resulted in neural stem cells that  
72 persist through a wave of developmental cell death (Maurange et al, 2008). However, the mechanism  
73 through which *Dichaete* may act to prevent activation of neural stem cell apoptosis remains unclear.  
74 We therefore investigated the connection between *Dichaete* and apoptosis, using the developmental  
75 cell death of *Drosophila* embryonic neural stem cells as a model system.

76 During embryonic development of the *Drosophila* nervous system, neural stem cells are  
77 generated in equal numbers within the thoracic and abdominal regions of the ventral nerve cord (VNC),  
78 resulting in approximately 30 neural stem cells per hemisegment. The majority of abdominal neural  
79 stem cells are eliminated by apoptosis towards the end of embryonic development, leaving a small  
80 number of abdominal neural stem cells that persist in the larval VNC (White et al, 1994; Harding &  
81 White 2018). Developmental apoptosis of neural stem cells requires the cell death genes *grim* and  
82 *reaper*, which are transcriptionally activated in the abdominal region of the embryo to promote  
83 apoptosis. Transcription of *grim* and *reaper* is controlled by an intergenic enhancer (*enh1*) that lies  
84 between the coding regions of these genes and that is removed in the *MM3* deletion background,  
85 resulting in ectopic abdominal neural stem cell survival in homozygous *MM3* mutants (Tan et al, 2011;  
86 Arya et al, 2015). The *enh1* regulatory element is sensitive to activation by the pro-apoptotic factors  
87 *abdominal-A* (*abdA*) and *grainyhead* (*grh*), which are both necessary and sufficient for neural stem cell  
88 apoptosis (Prokop et al, 1998; Bello et al, 2003; Cenci & Gould, 2005; Maurange et al, 2008; Arya et al,  
89 2015; Khandelwal et al, 2017). Grim and Reaper are RHG-domain containing proteins, which bind to  
90 the *Drosophila* Inhibitor of Apoptosis Protein 1 (DIAP1) resulting in increased DIAP1 turnover and  
91 release of bound initiator caspases, ultimately leading to cell death (Yang et al, 2000; Lisi et al, 2000;  
92 Suzuki et al, 2001; Wing et al, 2001; Ryoo et al, 2002; Yoo et al, 2002; Chai et al, 2003; Zachariou et  
93 al, 2003; Yokokura et al, 2004).

94 In this study, we took advantage of the stereotyped pattern of abdominal neural stem cell death in  
95 *Drosophila* to investigate the role of *Dichaete* in regulating apoptotic cell death. We find that  
96 overexpression of *Dichaete* is sufficient to block developmental cell death of abdominal neural stem  
97 cells, acting through the *enh1* regulatory region. We also investigate the endogenous mechanism  
98 through which neural stem cell apoptosis is activated and find that expression of the pro-apoptotic Hox  
99 gene *abdA* distinguishes between surviving and doomed neural stem cells, rather than *Dichaete* levels.

100 Finally, we show that multiple developmental defects of *Dichaete*-null embryos can be rescued by  
101 blocking ectopic cell death. Our findings suggest that both *Dichaete* and mammalian Sox2 may act as  
102 safeguards against activation of the apoptotic pathway in neural stem cells and in other tissues.

103

## 104 **METHODS**

105 **Fly stocks:** Flies were raised on standard cornmeal/yeast agar medium supplemented with live  
106 yeast. All crosses were performed at 25°C, embryos were collected on molasses plates supplemented  
107 with yeast paste. The following stocks were used in this study: *yw<sup>67c23</sup>*, *luc-RNAi* (BDSC #31603), *UAS-*  
108 *D* (BDSC #8861), *VAcht-GAL4* (BDSC #39220), *calx-GAL4/TM3* (BDSC #48160), *abdB-GAL4* (BDSC  
109 #49822), *UAS-GrhB/CyO* (BDSC #42227), *Grh.GFP* (BDSC #42272), *abdA-RNAi* (BDSC #35644). The  
110 *grim<sup>C15E</sup> rpr<sup>87</sup>*, *Df(3L)MM2* and *Df(3L)MM3* stocks have been described previously (Tan et al, 2011).  
111 The following stocks were kind gifts: *UAS-p35* (Hay et al, 1994), *UAS-Nicd* (S. Artavanis-Tsakonas &  
112 Kazuya Hori), *dcr2*, *PCNA-GFP*; *wor-GAL4* (Arya et al, 2015; IK Hariharan), *UAS-Grim(III)* and *D<sup>87</sup>/TM3*  
113 (Nambu lab; Nambu & Nambu 1996; Wing et al, 1998) and *UAS-AbdA::HA* (Graba lab). The enh1(b+c)-  
114 GFP reporter construct incorporates the genomic sequence from 3L:18,359,842..18,362,329 (r6.39).  
115 The second chromosome *wor-GAL4*, *UAS-NLS-dsRed* line was generated previously in our lab (Arya et  
116 al, 2015). The third chromosome *wor-GAL4*, *UAS-NLS-dsRed* recombinant line was generated for this  
117 study from BDSC #56554 and #8547, and balanced over *TM6B,tub-GAL80* from BDSC #9490. The  
118 *sim-GAL4*; *UAS-NLS-dsRed* stock was generated for this study from BDSC #9150 (Scholz et al, 1997)  
119 and #8547. *D<sup>87</sup>* allele sequencing was done with the following primers: an amplicon containing the  
120 deletion was generated using *D87 US* 5'[TCTTACGCTATGGGCCAGGTAT]3' with *D87 DS*  
121 5'[TCGTCTGATTCCAGTCACAACA]3', then sequenced with the internal primers *D seq 3*  
122 5'[AAAGCGTGTTCATGTCCTTT]3' and *D seq 6* 5'[TGGTTTGGAGGATTGGCTTACT]3'. Two  
123 independent recombinant *D<sup>87</sup>,MM3* lines were generated for this study and genotyped using the above  
124 *D<sup>87</sup>* primers and the following additional primer pairs:; *WH5'-* 5'[TCCAAGCGGCGACTGAGATG]3' with  
125 *MM3 US2* 5'[TGTATGCTACCAGCGAGCAAAT]3'; *WH3'+* 5'[CCTCGATATACAGACCGATAAAAC]3'  
126 with *MM3 DS2* 5'[TGACATTTGTCCAGGCTGACTT]3'.

127 **Embryo immunostaining:** Primary antibodies used in this study: anti-AbdA (goat, 1:500) Santa  
128 Cruz dH17; anti-Antp (mouse, 1:100) DSHB 4C3; anti-axons (mouse, 1:5) DSHB BP102; anti-cDcp1  
129 (rabbit, 1:100) Cell Signaling 9578; anti-cycB (mouse; 1:3) DSHB F2F4; anti-Dichaete (rabbit, 1:100)  
130 Nambu lab; anti-Dpn (rat, 1:150) Abcam ab195173; anti-dsRed (rabbit, 1:50) Clontech 632496; anti-  
131 Elav (mouse, 1:100) DSHB 9F8A9; anti-Engrailed (mouse, 1:2) DSHB 4D9; anti-GFP (chicken, 1:500)  
132 Abcam ab 13970; anti-GFP (rabbit, 1:250-1000) ThermoFisher A11122; anti-Grh (rabbit, 1:200) Bello

133 lab; anti-Repo (mouse, 1:5) DSHB 8D12; anti-slit (mouse, 1:5) DSHB C555.6D. All secondary  
134 antibodies were obtained from ThermoFisher and used at 1:200 dilution in 1% nonfat milk. Briefly,  
135 embryos were dechorionated with 50% bleach, fixed with 4% formaldehyde in equal volume heptane  
136 and stored in 100% ethanol at -20°C if not used immediately. Embryos were rehydrated into PBS+0.1%  
137 Triton X-100 (PBST), blocked with 1% nonfat milk for 30min – 2h at room temperature prior to addition  
138 of primary antibodies. Primary incubations were performed for 2-5 days at 4°C in 1% nonfat milk,  
139 embryos were washed in PBST (>1h) and secondary incubations were performed for 2h at room  
140 temperature or overnight at 4°C in 1% nonfat milk. Embryos were washed with PBST (>1h), then rinsed  
141 with PBS and mounted with Fluoromount G mounting media. All embryos for quantitative fluorescent  
142 analysis measurements were processed in parallel.

143 **RNA fluorescent in situ hybridization:** RNA-FISH was performed as described previously  
144 (Tan et al, 2011). 100ng DIG-labelled probe against *grim* or *reaper* transcript was used per sample  
145 (Sigma, 11-175-025-910). Probes were hybridized at 56°C overnight and subsequently detected by  
146 anti-DIG at 4°C overnight (1:1000; Roche 11-207-733-910) with secondary tyramide signal amplification  
147 for 2h at room temperature in the dark (AKOYA Biosciences, Cat NEL744001KT). Immunostaining was  
148 performed in conjunction with RNA-FISH: anti-GFP was incubated with samples at the same time as  
149 anti-DIG, and secondary antibody incubations were performed prior to TSA reactions.

150 **Imaging, quantification and statistical analysis:** All imaging was done on a Nikon A1  
151 confocal system with 1.0um between z-steps, scale bars are indicated on all images. All slides for a  
152 given experiment were imaged at the same confocal settings. All image analysis was performed using  
153 FIJI. Statistical analysis was performed using Graphpad Prism, all comparisons are unpaired  
154 parametric t-tests. Statistical levels of significance are indicated on figures as follows: \* p<0.05, \*\*  
155 p<0.01, \*\*\* p<0.005, \*\*\*\* p<0.0001.

156 Quantification of cell numbers was performed by scrolling through all z-stacks and identifying  
157 Dpn+ nuclei within the region of interest (3 abdominal hemisegments, unless otherwise noted). Midline  
158 glia were analyzed in the same way and identified as Slit- holes within the midline cluster. Unless noted  
159 otherwise, fluorescent intensity measurements were performed on a single z-stack within the nuclear  
160 Dpn+ area, (except Fig 3 where PCNA-GFP was used to demarcate the cytoplasmic cell boundary) and  
161 normalized by subtracting background mean intensity of five areas of similar size within the same z-  
162 stack. For AbdA/Grh/D expression analysis in Fig 2, data were obtained from two technical replicates  
163 for each antibody staining. Values from each replicate of antibody staining were normalized to each  
164 other by centering on the mean expression level obtained from all cells at stage 13 in that replicate.  
165 Some values represent a single data point due to cell scarcity at later embryonic time points.

166 En stripe analysis in Fig 8 was performed on maximum projections using the “Plot Profile”  
167 function in FIJI along a segmented line, where each segment was perpendicular to the axis of the En  
168 stripe. All lines were 270um+/-5um long to avoid distortion of the signal along the X-axis. Hindgut length  
169 analysis in Fig 8 was performed on maximum projections using the line tool in FIJI, each measurement  
170 was taken from the anterior point of the posterior spiracles to the farthest anterior point of the hindgut  
171 En staining.

172

## 173 **RESULTS**

### 174 **Dichaete inhibits neural stem cell apoptosis**

175 Developmental cell death in *Drosophila* is regulated by the transcriptional activation of the RHG  
176 genes, including *grim* and *reaper*. To identify regulators of developmental cell death in the *Drosophila*  
177 embryo, we screened transcription factors and other DNA binding proteins for a role in regulating neural  
178 stem cell death (Arya et al, 2015). We identified *Dichaete* (*D*) as a candidate, consistent with the larval  
179 phenotype described in Maurange et al (2008). We overexpressed *Dichaete* with the neural stem cell  
180 driver *worniu-GAL4* (*wor-GAL4*) and found a significant increase in the number of cells expressing  
181 Deadpan (Dpn), a neural stem cell-specific transcription factor, in the abdominal region of the VNC at  
182 the end of embryogenesis (Fig 1A-B).

183 Multiple cellular processes could lead to the generation of ectopic neural stem cells in the VNC,  
184 including increased stem cell specification, inhibition of differentiation of neural progeny or the inhibition  
185 of abdominal neural stem cell death. To distinguish between ectopic neural stem cells generated  
186 through these processes, we assessed the effect of *Dichaete* on specification and differentiation. To  
187 address neural stem cell specification, we examined the number of Dpn+ neural stem cells at early  
188 stages of neurogenesis. While ectopic expression of a constitutively active form of Notch (*N<sup>icd</sup>*), known  
189 to promote neural stem cell identity (Bowman et al, 2008; Song & Lu, 2011; Zacharioudaki et al, 2012),  
190 significantly increased the number of Dpn+ cells observed at stage 14, we did not see any change in  
191 this early population when *Dichaete* was overexpressed or when cell death was inhibited with the  
192 caspase inhibitor p35 (Fig 1C). Next, we directly assessed whether *Dichaete* overexpression increased  
193 Dpn+ cell numbers by inhibiting the differentiation of neural progeny. We overexpressed *Dichaete* in a  
194 single neural stem cell lineage using the *Vacht-GAL4* driver (Lacin & Truman, 2016; Harding & White,  
195 2019). The *Vacht-GAL4* driver is expressed in the neural stem cell NB3-5 and its progeny in each  
196 hemisegment. We have shown that NB3-5 is not eliminated by apoptosis (Harding & White, 2019),  
197 allowing us to evaluate the number of Dpn+ cells in this lineage at the end of embryogenesis. We did  
198 not see ectopic Dpn+ cells with overexpression of *Dichaete* or p35 within this lineage, whereas *N<sup>icd</sup>* was

199 sufficient to generate additional Dpn+ cells (Fig 1D-E). Additionally, we tested whether ectopic neural  
200 stem cells in *Dichaete* overexpression embryos may be differentiated progeny that have failed to turn  
201 off the Dpn marker. However, we saw no co-expression of Dpn and either Repo (glial marker) or Elav  
202 (neuronal marker) in both control and *wor>D* embryos (Fig S1). Lastly, we recently described a novel  
203 terminal neural stem cell fate in the embryo that we have termed non-apoptotic loss (NAL; Harding &  
204 White 2019), which occurs specifically in G2 quiescent (G2Q) neural stem cells. We therefore tested  
205 whether *Dichaete* suppressed NAL, following our previous analysis. We found that *Dichaete* does not  
206 preferentially rescue the G2Q/cycB+ population that is subject to NAL (Fig 1F), indicating that ectopic  
207 neural stem cells in *wor>D* embryos do not result from inhibition of this novel fate. From these results,  
208 we conclude that the ectopic abdominal neural stem cells observed in embryos upon *Dichaete*  
209 overexpression are due to inhibition of apoptosis.

210

### 211 **AbdA levels, but not D or Grh, distinguish doomed and surviving neural stem cells**

212 Activation of neural stem cell death has been shown to depend on the Hox gene *abdA* and the  
213 transcription factor *grh* (Prokop et al, 1998; Bello et al, 2003; Cenci & Gould 2005; Maurange et al,  
214 2008; Arya et al, 2015; Khandelwal et al, 2017). We have now shown that *Dichaete* is sufficient to  
215 rescue embryonic neural stem cells from apoptosis, in addition to its previous characterization in larval  
216 development (Maurange et al, 2008). Integration of the roles of *abdA*, *grh* and *Dichaete* in cell death  
217 has been proposed in a previous model, whereby mutually exclusive Grh and D expression states  
218 signal the ability of a neural stem cell to undergo apoptosis: D+Grh- status is converted to D-Grh+  
219 through a timing signal mediated by the temporal factor *castor*, and the D-Grh+ state is required for  
220 AbdA-mediated neural stem cell death (Maurange et al, 2008). Within this model, failure to repress  
221 *Dichaete* prevents downstream activation of RHG-mediated apoptosis, but the mechanism through  
222 which this occurred remained unclear.

223 To test this model directly, we took advantage of GAL4 driver lines generated by the Janelia  
224 Research Farms and characterized by Lacin & Truman (2016). We selected three GAL4 lines, *VAcht-*  
225 *GAL4*, *calx-GAL4* and *abdB-GAL4*, that are expressed in specific subsets of neural stem cells within  
226 each hemisegment of the VNC (Fig 2A), as described in Lacin & Truman (2016). These marked  
227 subsets include neural stem cells of known fate, including the surviving cell NB3-5 marked by *VAcht-*  
228 *GAL4* (described above), a mix of one surviving and four doomed cells marked by *calx-GAL4* and three  
229 doomed cells marked by *abdB-GAL4*. We used these drivers to express a nuclear dsRed fluorescent  
230 reporter and validated the neural stem cell assignments of these drivers by calculating the frequency  
231 with which an individual stem cell is observed per hemisegment at each stage of development. As the

232 drivers have variable penetrance (Lacin & Truman, 2016), we normalized these frequencies to the  
233 maximum observed at any timepoint between embryonic stages 13-17 (plotted as red [doomed  
234 lineages] and green [survivor lineages] bars in Fig 2C-E). Our validation confirms that these driver lines  
235 are able to accurately identify individual neural stem cells of known fate *in vivo*, allowing us to use them  
236 to assess expression of cell death regulators in single cells over time.

237 We used these drivers to quantify expression patterns of AbdA, D and Grh protein in individual  
238 neural stem cells from stages 13-17 of embryonic development. We drove a nuclear dsRed reporter  
239 and co-stained embryos for either AbdA, D or Grh, and Dpn to identify the neural stem cells. As an  
240 internal control, we correlated data points between replicate measurements of NB6-2, which is marked  
241 independently by *calx-GAL4* and *abdB-GAL4*. We found good correlation between these independent  
242 data sets (Fig S2), indicating that our strategy is able to accurately and reproducibly measure protein  
243 expression levels in individual neural stem cells.

244 We found that AbdA levels consistently rise to a higher peak in doomed cells just preceding the  
245 time of death, and this AbdA peak is not seen in the two surviving neural stem cells (Fig 2B-E). This  
246 suggests that AbdA levels alone are sufficient to distinguish between these two fates of neural stem  
247 cells. In contrast to the previously suggested model, we found no evidence for a consistent D+Grh- to  
248 D-Grh+ transition within individual doomed cells (Fig 2D-E). Grh was generally upregulated over time in  
249 all cells regardless of their fate, consistent with its documented role as a late member of the temporal  
250 series (Maurange et al, 2008; Kohwi & Doe, 2013; Harding & White 2018). D was more variably  
251 expressed over time, with no obvious correlation between levels of D and ultimate cell fate. To directly  
252 assess co-expression of Dichaete and Grh, we used a protein tagged GrhGFP allele and co-stained  
253 embryos for D, GFP and Dpn. The GrhGFP protein faithfully recapitulates endogenous Grh expression  
254 (Fig S3A). We find that surviving neural stem cells in the abdominal region of stage 17 embryos  
255 express both D and GrhGFP (Fig S3B), suggesting that there is no mutual exclusivity in expression of  
256 these transcription factors. With this new information in hand, we proceeded to investigate the  
257 mechanism through which *Dichaete* blocks neural stem cell apoptosis.

258

### 259 **Dichaete down-regulates transcription of cell death genes *grim* and *reaper***

260 As *Dichaete* is a transcription factor that has been shown to act variably as a transcriptional  
261 activator and repressor (Sarkar & Hochedlinger 2013), we hypothesized that *Dichaete* might act by  
262 regulating transcription of the cell death genes *grim* and *reaper* (*rpr*), which are required for neural stem  
263 cell apoptosis (White et al, 1994; Chen et al, 1996; Peterson et al, 2002; Tan et al, 2011). To assess  
264 *grim* and *rpr* expression, we used RNA fluorescent in situ hybridization (RNA-FISH; Tan et al, 2011;



265 Arya et al, 2015; Arya et al, 2019). As we find that the Dpn protein epitope does not survive the RNA-  
266 FISH protocol, we used a PCNA-GFP reporter that marks proliferating cells as an alternative method to  
267 identify cell types in the developing nervous system: PCNA-GFP is expected to label both dividing  
268 neural stem cells and their immediate proliferative progeny, the ganglion mother cells (GMCs). We find  
269 that 60-64% of PCNA-GFP+ cells are Dpn+ at stage 14, and 46-48% at stage 15 in control and *wor>D*  
270 embryos, confirming that the PCNA-GFP reporter marks a similar population in both of these genetic  
271 conditions (Fig S4A). We found that overexpression of *Dichaete* decreased the level of both *grim* and  
272 *rpr* transcription in PCNA-GFP+ cells compared to control embryos (Fig 3A-D; Fig S4B-C). We  
273 confirmed that the lack of transcripts in *wor>D*-rescued PCNA-GFP+ cells is not due to rapid mRNA  
274 turnover in “undead” cells where apoptosis is blocked. Using the baculovirus caspase inhibitor p35 to  
275 block apoptosis, we found that *grim* transcript accumulates to significantly higher levels compared to  
276 *Dichaete* overexpression (Fig 3A-B), indicating that the *grim* transcript is not eliminated in undead cells.  
277 These results suggest that *Dichaete* inhibits apoptosis by preventing transcription of pro-apoptotic  
278 genes *grim* and *rpr*.

279

### 280 **Dichaete acts through the MM3 intergenic region to inhibit cell death**

281 We have previously described a regulatory element (enhancer1; *enh1*) that is required for *grim*  
282 and *rpr* transcription and is found within the Neuroblast Regulatory Region (NBRR; Tan et al, 2011;  
283 Arya et al, 2015). To test whether *Dichaete* regulates *grim* and *rpr* transcription by altering activity of  
284 this regulatory element, we examined the effects of *Dichaete* overexpression and loss of function on  
285 *enh1*-GFP and *enh1*-dsRed reporters. These transgenic reporters of *enh1* activity contain either 2.5kb  
286 (*enh1*-GFP) or 5kb (*enh1*-dsRed) of the cell death regulatory element, driving fluorescent protein  
287 expression. These reporters are specifically expressed in doomed neural stem cells in control embryos  
288 (Arya et al, 2015; Fig 4). We found that neural stem cells rescued by *Dichaete* overexpression are  
289 *enh1*-GFP-negative, suggesting that *Dichaete* acts upstream of *enh1* (Fig 4A-B). In addition, we find  
290 that, while *enh1*-GFP signal accumulates in p35-rescued cells, co-expression of *Dichaete* and p35  
291 significantly inhibits the expression of *enh1*-GFP in ectopic neural stem cells (Fig 4A-B). This result  
292 further indicates that *Dichaete* prevents the activation of the *enh1*-GFP transcriptional reporter of cell  
293 death.

294 To assess the endogenous relationship between *Dichaete* and activation of the cell death  
295 enhancer, we examined levels of *Dichaete* expression in *enh1*-GFP+ and *enh1*-GFP- neural stem cells  
296 in a wild type background. We also performed the same analysis with the pro-apoptotic factors *AbdA*  
297 and *Grh*. Consistent with our single neural stem cell analysis (Fig 2), we find that *AbdA* expression is

298 significantly higher in the doomed enh1-GFP+ cells than the enh1-GFP- population at multiple time  
299 points (Fig S5A), while Grh and Dichaete generally show no significant difference in expression levels  
300 between these populations with the exception of stage 14 for Grh (Fig S5B-C). We note that while  
301 enh1-GFP expression is specific to doomed neural stem cells, not all dying neural stem cells express  
302 enh1-GFP, leading our measurements to be a likely underestimate of the expression differences of  
303 these factors between doomed and surviving neural stem cells.

304 We next examined the effect of *Dichaete* loss of function on enh1-dsRed reporter expression,  
305 using the *D<sup>87</sup>* allele generated by Nambu & Nambu (1996). We sequenced this allele and found that *D<sup>87</sup>*  
306 lacks 5'UTR and coding sequences of the *Dichaete* gene (deletion coordinates  
307 3L:14,176,758..14,177,440 r6.38). In the *D<sup>87</sup>* mutant background, the enh1-dsRed reporter is strongly  
308 derepressed in the thorax of the embryo compared to sibling control embryos, and ectopic dsRed+ foci  
309 are observed throughout the thoracic and abdominal regions of the VNC (Fig 4C). Furthermore, at  
310 stage 14, enh1-dsRed expression is expanded outside of the nervous system to stripes in the  
311 epidermis. The thoracic domain of derepression coincides with the expression domain of Antp, which is  
312 normally co-expressed with Dichaete in early embryonic stages (Fig S6A). Dichaete is also co-  
313 expressed with AbdA at early embryonic stages in the neuroectoderm (Fig S6B). These results suggest  
314 that Dichaete normally functions to repress ectopic activation of the enh1 reporter by multiple Hox  
315 genes.

316 We find no evidence for ectopic upregulation or derepression of Grh or AbdA in the *D<sup>87</sup>* mutant  
317 embryos (Fig S7A-B), suggesting that the ectopic activation of the enh1-dsRed reporter does not occur  
318 through misregulation of these factors. Our results suggest that *Dichaete* is both necessary and  
319 sufficient for repression of the enh1 cell death regulatory element, while endogenous activation of the  
320 reporter is correlated with increased AbdA expression levels rather than downregulation of Dichaete.

321

### 322 **Midline glia cell death is *MM3*- and *Dichaete*-independent**

323 The ability of *Dichaete* to regulate enh1 reporters does not rule out that it may also act at other  
324 genomic regions within the cell death locus to block apoptosis. To address this question, we tested  
325 whether *Dichaete* could block the apoptotic death of midline glia. Similar to neural stem cells, midline  
326 glia are generated in excess during embryogenesis and the majority are eliminated by cell death (Zhou  
327 et al, 1995; Dong & Jacobs, 1997). Within the embryonic nervous system, midline glia are the source of  
328 a secreted glycoprotein Slit (Rothberg et al, 1990). Apoptosis of midline glia is blocked by the *H99*  
329 deletion that removes the cell death genes *hid*, *grim* and *rpr* as well as the intervening sequences  
330 (White et al, 1994; Zhou et al, 1995; Dong & Jacobs, 1997). Deletion of *grim* and *rpr* alone in *grim*

331 *rpr/MM2* mutants also inhibits midline glia death as detected by Slit staining (Fig 5A-B), confirming that  
332 some of this death is dependent on *grim* and *rpr*. However, it is unclear whether midline glia and neural  
333 stem cell apoptosis share regulatory elements. We therefore tested the effect of the intergenic *MM3*  
334 deletion on midline glia cell death. We found that *MM3* mutant embryos have wild type numbers of Slit+  
335 midline glia, indicating that midline glia cell death is *MM3*-independent (Fig 5A-B). We next tested  
336 whether *Dichaete* misexpression can block this form of *MM3*-independent cell death using the *sim*-  
337 *GAL4* driver combined with nuclear dsRed (Scholz et al, 1997; Sánchez Soriano & Russell, 1998). We  
338 find that *Dichaete* overexpression does not block midline glia death, whereas blocking death with  
339 *sim>p35* resulted in significant rescue of midline glia (Fig 5C-D). *Dichaete* therefore cannot block this  
340 *MM3*-independent apoptosis. From these findings and those above, we conclude that *Dichaete* inhibits  
341 cell death by preventing activation of the *enh1* regulatory region, and may not block cell death by acting  
342 through additional regions of the cell death locus.

#### 343 344 **Dichaete acts downstream of AbdA and Grh to block cell death**

345 As AbdA and Grh have been shown previously to regulate the *enh1* element (Arya et al, 2015;  
346 Khandelwal et al, 2017), we wondered how the role of *Dichaete* in blocking neural stem cell death  
347 intersected with these pro-apoptotic regulators. We first tested the effect of *Dichaete* overexpression on  
348 levels of AbdA and Grh. We found that *Dichaete* overexpression significantly downregulated expression  
349 of both AbdA and Grh (Fig S8A-B), suggesting that *Dichaete* inhibits neural stem cell death by turning  
350 down pro-death signalling through AbdA and Grh. We note that the decrease in AbdA levels in *wor>D*  
351 embryos is still significantly higher than those seen with *wor>abdA-RNAi*, however both genotypes  
352 have similar neural stem cell survival at stage 17 (Fig S8C). To directly test the functional relationship  
353 between AbdA/Grh and *Dichaete*, we co-expressed *Dichaete* and either *abdA* or *Grh* and assessed  
354 neural stem cell survival. Interestingly, we found that *Dichaete* was able to rescue neural stem cell  
355 apoptosis even in the context of *abdA* or *Grh* overexpression (Fig 6A-B). Both *abdA* and *Grh* are  
356 sufficient to kill thoracic neural stem cells with the *wor-GAL4* driver (Fig S9), indicating that they  
357 ectopically activate cell death in these conditions. We also find that *abdA* and *Grh* are not sufficient to  
358 kill midline glia (Fig S10A-B), nor does RNAi knockdown of *abdA* lead to ectopic midline glia (Fig S10C-  
359 D). Taken together with the finding that the *MM3* region is not required for midline death, these data  
360 suggest that, as with *Dichaete*, the mechanism through which *abdA* and *grh* activate cell death requires  
361 sequences within the *MM3* region. Together, our findings suggest that *Dichaete* is able to block cell  
362 death through two mechanisms: downregulation of pro-apoptotic factors AbdA and Grh, and inhibition  
363 of AbdA/Grh activity within the *MM3* region (Fig 6C).

364

### 365 **Dichaete mutant phenotypes are rescued by blocking cell death**

366 Thus far, our findings have pointed to a model in which *Dichaete* acts upstream of the enh1  
367 regulatory region to inhibit neural stem cell death. To test whether *Dichaete* also functions downstream  
368 of this regulatory element, we generated recombinant alleles of *D<sup>87</sup>* and *MM3* to examine neural stem  
369 cell survival in this background. Consistent with previous reports (Overton et al, 2002; Zhao & Skeath,  
370 2002), we find that *D<sup>87</sup>* mutant embryos display a loss of abdominal neural stem cells at stage 14 (Fig  
371 S11A), however we find that these mutants show wild type neural stem cell numbers at stage 17 (Fig  
372 7A-B). Two independent recombinant *D<sup>87</sup>,MM3* alleles completely recapitulated the *MM3* neural stem  
373 cell survival phenotype (Fig 7A-B), indicating that *Dichaete* is not required to block cell death  
374 downstream of *MM3*. Interestingly, the *D<sup>87</sup>,MM3* embryos also rescue the reduction in neural stem cell  
375 numbers observed in *D<sup>87</sup>* mutant embryos at stage 14 (Fig S11A), suggesting that the loss of neural  
376 stem cells in early *D<sup>87</sup>* embryos is due to ectopic activation of cell death. We note that these defects are  
377 restricted to the AbdA domain, whereas numbers of neural stem cells in the thorax of stage 14 *D<sup>87</sup>*  
378 embryos are normal (Fig S11B).

379 In addition to neural stem cell phenotypes, *D<sup>87</sup>* mutants display significant axonal disorganization,  
380 including narrowing of longitudinal connectives between segments and fusion of commissural axons  
381 across the midline (Nambu & Nambu 1996; Sánchez Soriano & Russell, 1998). We therefore tested  
382 whether axonal morphology is rescued in *D<sup>87</sup>,MM3* embryos by staining for axon tracts with the  
383 monoclonal BP102 antibody (Elkins et al, 1990; Nambu & Nambu 1996; Sánchez Soriano & Russell,  
384 1998). We find that *D<sup>87</sup>,MM3* recombinant embryos have improved organization of both longitudinal and  
385 commissural axon tracts relative to *D<sup>87</sup>* mutants alone, but do not fully recapitulate wild type  
386 organization (Fig 7C). As *Dichaete* expression in midline glia alone is sufficient to rescue axonal defects  
387 of *Dichaete* null embryos (Sánchez Soriano & Russell, 1998), we examined midline glia populations in  
388 *D<sup>87</sup>,MM3* embryos and found rescue of Slit+ cells along the midline relative to the *D<sup>87</sup>* mutant alone (Fig  
389 7D). Again we find that the *D<sup>87</sup>,MM3* background does not completely recapitulate wild type  
390 organization of midline glia, consistent with our observation of improved but not completely rescued  
391 axonal morphology.

392 Our previous data suggests that *Dichaete* is required to inhibit AbdA-activated death. We observe  
393 that AbdA is expressed along the midline of wild type stage 11 embryos (Fig S12A), suggesting that  
394 loss of *Dichaete* leads to ectopic, AbdA-mediated death of midline cells. We did not observe AbdA and  
395 Slit co-expression at stage 15 (Fig S12B), consistent with our observation that normal midline glia cell  
396 death is AbdA-independent. A previous report has shown that *Dichaete* directly regulates *slit*

397 expression and contributes to expression of *sim*, which is required for the formation of midline glia  
398 (Nambu et al, 1991; Ma et al, 2000). Our results indicate that the midline glia and Slit expression can be  
399 rescued in  $D^{87}$  mutants by blocking cell death, suggesting that Slit expression can still be maintained  
400 downstream of *Dichaete*. This could be mediated by factors such as *sim* or *ventral veins lacking* (*vvl*,  
401 also referred to as *drifter*), which cooperate with *Dichaete* to specify the midline glia (Ma et al, 2000).  
402 Together with the findings above, these results suggest that the primary neural defect in  $D^{87}$  mutant  
403 embryos is ectopic activation of cell death, resulting in loss of neural stem cells and midline signaling.

404 As  $D^{87}$  mutants display defects in segmentation (Nambu & Nambu 1996; Sánchez Soriano &  
405 Russell, 1998), we tested whether loss of *Dichaete* led to ectopic activation of cell death in stage 10/11  
406 embryos by assessing levels of active, cleaved Dcp1 caspase (cDcp1). We found that  $D^{87}$  mutant  
407 embryos at this stage display ectopic cDcp1 staining compared to control embryos, indicating that cell  
408 death is precociously activated in the absence of *Dichaete* (Fig S13). Notably, ectopic cDcp1 staining is  
409 largely absent from the thoracic segments of  $D^{87}$  mutants but present in the head and abdominal  
410 regions. To determine if the segmentation defects are due to cell death, we examined segmentation  
411 patterns in  $D^{87}$  and  $D^{87},MM3$  mutants by staining for Engrailed (En), which is expressed at the posterior  
412 border of embryonic segments. We measured En intensity along 9 stripes from anterior to posterior and  
413 found a periodic pattern of staining with regular spacing in control embryos using this method (Fig 8A-  
414 B). In contrast, the En stripes in  $D^{87}$  mutants are disrupted and irregular, including missing segments  
415 and stripes that have fused together as has been described previously (Fig 8A-B; Nambu & Nambu  
416 1996). We found that the striped En pattern is largely rescued in the  $D^{87},MM3$  background relative to  
417  $D^{87}$  mutants, restoring the 9 stripe periodicity of En staining in our quantification (Fig 8A-B). This  
418 suggests that the segmentation errors observed upon loss of *Dichaete* are due to ectopic cell death,  
419 activated by regulatory elements deleted in *MM3*.

420 In addition to segmentation and neural phenotypes,  $D^{87}$  mutants also exhibit hindgut defects  
421 (Sánchez Soriano & Russell, 2000). *Dichaete* is expressed in the primordium of this tissue and is  
422 required for proper development of the hindgut (Sánchez Soriano & Russell, 2000). However, the  
423 mechanism through which loss of *Dichaete* prevents normal development of the hindgut is unclear. As  
424 noted above, the defects of  $D^{87}$  embryos are prominent within the domain of AbdA expression. We  
425 stained wild type embryos for *Dichaete* and AbdA, and found that they are co-expressed in the hindgut  
426 primordium at stage 10 (Fig S14). We therefore tested whether hindgut defects of  $D^{87}$  embryos are  
427 rescued in the  $D^{87},MM3$  background, by again staining for En which marks the posterior gut (Sánchez  
428 Soriano & Russell, 2000; Takashima & Murakami, 2001). We found that  $D^{87},MM3$  embryos exhibit  
429 significant rescue of hindgut tissues relative to  $D^{87}$  embryos (Fig 8C-D). Together these results lead us

430 to propose that *Dichaete* loss of function in multiple tissues leads to the ectopic activation of cell death,  
431 resulting in posterior segmentation defects and tissue loss.

432

## 433 **DISCUSSION**

434 In this work, we have investigated the function of the transcription factor *Dichaete* in regulating  
435 cell death in the *Drosophila* embryo. We have found that *Dichaete* is sufficient to inhibit developmental  
436 cell death of neural stem cells, and that *Dichaete* overexpression is associated with transcriptional  
437 downregulation of the cell death genes *grim* and *rpr*. The results obtained with our enhancer reporter  
438 and additional genetic data indicate that *Dichaete* blocks cell death by inhibiting activation of the enh1  
439 regulatory region. Consistent with this model, we find that *Dichaete* downregulates expression of both  
440 AbdA and Grh, pro-apoptotic factors that are known to regulate enh1. Interestingly, we find that  
441 *Dichaete* can also block cell death downstream of AbdA and Grh, suggesting multiple mechanisms  
442 through which high levels of *Dichaete* interfere with activation of the apoptotic pathway. We also  
443 examined loss of function phenotypes of *Dichaete* and have shown that a primary defect in multiple  
444 tissues of *D<sup>87</sup>* mutant embryos is the ectopic activation of cell death, particularly in tissues that express  
445 AbdA. Blocking apoptosis with the intergenic *MM3* deletion is sufficient to rescue neural, segmentation  
446 and hindgut phenotypes observed in *D<sup>87</sup>* mutant embryos. This work describes a novel role for *Dichaete*  
447 in inhibiting apoptosis by regulating the enh1 cell death regulatory region and demonstrates that ectopic  
448 cell death contributes to a range of phenotypes observed upon loss of *Dichaete* function.

449

## 450 **Model for Dichaete-mediated protection against AbdA**

451 Our work has identified a role for *Dichaete* in preventing ectopic activation of the cell death  
452 pathway. Our analysis of Dichaete and AbdA protein expression patterns in early embryos indicates  
453 that Dichaete is expressed constitutively throughout the epidermis prior to the onset of AbdA protein  
454 expression (Fig S6). Later, these proteins are expressed in distinct but overlapping domains in the  
455 embryo. The earliest embryonic defects arise in *D<sup>87</sup>* mutants around stage 5, where the expression  
456 pattern of the pair-rule gene *fushi tarazu* (*ftz*) is disrupted (Nambu & Nambu, 1996). The location of this  
457 disruption overlaps with the domain of early *abdA* transcript expression (Berkeley Drosophila Genome  
458 Project; Tomancak et al, 2002), suggesting a correlation between *abdA* expression and morphological  
459 defects upon loss of *Dichaete*.

460 We suggest a model in which the balance of anti-apoptotic signaling from *Dichaete* and pro-  
461 apoptotic signaling from *abdA* are integrated at enh1 (Fig 8E). Endogenous activation of abdominal  
462 neural stem cell death is associated with a pulse of high AbdA protein expression, which does not occur

463 in surviving neural stem cells. We observe that *Dichaete* overexpression is sufficient to block *abdA*-  
464 mediated killing of neural stem cells (Fig 6). This suggests that overexpression recapitulates the high  
465 levels of *Dichaete* normally found in the neuroectoderm of early embryos, where an early wave of *AbdA*  
466 is expressed (Fig S6). We also show that *Dichaete* is not essential for all neural stem cell survival, as  
467 when we examined the effect of *Dichaete* loss of function, we did not observe ectopic death of thoracic  
468 neural stem cells or abdominal neural stem cell at the end of embryogenesis (Fig 7; Fig S11). As  
469 described above, in the two surviving neural stem cells that we are able to identify, we do not observe  
470 high *AbdA* expression. Thus, the loss of *Dichaete* in these cells does not lead to their ectopic death, as  
471 they do not express *AbdA*. We have now shown that morphological defects in multiple tissues are  
472 primarily the result of ectopic cell death, indicating that *Dichaete* normally functions to specifically  
473 protect against cell death activation associated with early expression of *abdA*. Our work indicates a  
474 context-specific requirement for *Dichaete* function in preventing cell death, associated with protection  
475 against high *abdA* levels.

476

#### 477 **Regulation of cell death genes by *enh1***

478 Our work here and in previous studies has pointed to the *enh1* regulatory region as a hub for cell  
479 death signal integration (Tan et al, 2011; Arya et al, 2015; Arya et al, 2019), leading to timely and  
480 accurate activation of cell death gene expression in neural stem cells. Additional work from others has  
481 determined that sequences within the *enh1* region can be directly bound by *AbdA* and *Grh*, leading to  
482 the formation of a multi-protein tetracomplex on DNA *in vitro* (Khandelwal et al, 2017). While not  
483 investigated in this study, there is strong evidence for direct binding of *Dichaete* to the *enh1* regulatory  
484 region as well, as determined by ChIP and DamID (modENCODE, 2010; Negrè et al, 2011; Aleksic et  
485 al, 2013). Taken together, this evidence suggests that physical binding of *Dichaete* to *enh1* may  
486 prevent its recognition by the pro-apoptotic factors *AbdA* and *Grh*. This model is consistent with our  
487 finding that *Dichaete* overexpression is sufficient to block *AbdA*- or *Grh*-mediated killing (Fig 6).  
488 Similarly, we observe that loss of *Dichaete* leads to derepression of the *enh1*-*dsRed* reporter (Fig 4C),  
489 indicating that *Dichaete* is normally required to suppress activity of this enhancer. We can imagine two  
490 mechanisms through which *Dichaete* could function to block *AbdA* activity at *enh1*: *Dichaete* binding  
491 itself may physically prohibit subsequent *AbdA* binding, or *Dichaete* may recruit additional factors that  
492 serve to create a non-permissive environment around *enh1*.

493 In this work, we also find that *Dichaete* overexpression is sufficient to downregulate transcription  
494 of the cell death genes *grim* and *rpr* (Fig 3). We have previously shown that the *MM3* region containing  
495 *enh1* is required for expression of *grim* and *rpr* in neural stem cells (Tan et al, 2011). However, it

496 remains unclear how the regulatory signals at the enh1 hub are relayed to the promoters of *grim* and  
497 *rpr*. We have recently shown that multiple cohesin complex members are required for neural stem cell  
498 death (Arya et al, 2019), implicating long-range chromatin interactions in the activation of the cell death  
499 genes. Interestingly, recent work detected tissue-specific DNase hypersensitivity peaks at enh1, *grim*  
500 and *rpr* in *worniu-GAL4*-expressing cells at 4-6h, many hours before activation of neural stem cell death  
501 (Reddington et al, 2020). Consistent with recent datasets obtained from single cell ATAC- and RNA-seq  
502 (Bonn et al, 2012; Cusanovich et al, 2018; Reddington et al, 2020), the DNase hypersensitivity peaks  
503 observed within the cell death locus prior to death indicates that accessibility of the enhancer and  
504 promoters is not sufficient for gene expression, and that opening of the chromatin region occurs prior to  
505 gene activation. It will be of great interest in the future to examine if chromatin states of enh1 and the  
506 *grim/rpr* promoters are coupled, potentially through their physical interactions *in vivo*, and what  
507 mechanisms mediate transmission of regulatory input at enh1 to the gene promoters.

508

### 509 **Differential integration of Hox signaling**

510 As noted above, we observed strong de-repression of the enh1-dsRed reporter in the absence of  
511 *Dichaete* function (Fig 4C). This derepression was observed in both the thoracic and abdominal regions  
512 of the embryo, however we did not observe a concomitant activation of ectopic cell death in the thorax:  
513 thoracic neural stem cell counts are normal at stage 14 in *D<sup>87</sup>* embryos and thoracic segmentation  
514 defects were less pronounced than those in the posterior. Our observations are entirely consistent with  
515 the initial phenotypic description of the *D<sup>87</sup>* allele by Nambu & Nambu (1996), which found no effect on  
516 thoracic denticle belts in *D<sup>87</sup>* embryos and noted that segmentation defects were largely restricted to the  
517 abdominal region. The observed discrepancy in coupling of enh1-dsRed reporter expression to  
518 activation of the cell death genes could reflect endogenous differences in the function of the two Hox  
519 genes expressed in these domains, Antp and AbdA.

520 While Hox genes have been studied extensively for decades, very little is known about the  
521 mechanism through which this family of transcriptional regulators interfaces with the transcriptional  
522 machinery. The few existing studies have suggested that Hox proteins variously interact with RNA  
523 Polymerase II-associated factors, including Mediator complex members Med13 and Med19 (Boube et  
524 al, 2000; Boube et al, 2014), TAF3 (TATA-activating factor 3; Prince et al, 2008) and the transcription  
525 pausing factor M1BP (Zouz et al, 2017). In a direct comparison of Med19 binding to multiple Hox  
526 proteins, the Hox domain of Antp protein was sufficient for strong binding to Med19, whereas a weaker  
527 interaction was observed for AbdA (Boube et al, 2014). Mining of protein interaction databases has also  
528 suggested that Antp and AbdA interact with distinct general transcription factors (reviewed in



529 Rezsóhazy et al, 2015), potentially arguing for functional differences in their ability to couple enhancer  
530 signaling to transcriptional activation of downstream target genes such as *grim* and *reaper*. However, to  
531 date there has been no systematic analysis of differential Hox protein interactions with the  
532 transcriptional machinery, and the identity of factors that may contribute to selectivity of the effects of  
533 Antp and AbdA are unknown.

534 We have previously found that the enh1-GFP reporter is responsive to multiple Hox genes,  
535 including *Drosophila abdB* and *Ubx* and mammalian HoxA9 and HoxB8 (Arya et al, 2015). Furthermore,  
536 overexpression of *antp*, *Ubx*, *abdA* and *abdB* have all been shown to ectopically kill embryonic and  
537 post-embryonic neural stem cells (Bello et al, 2003; Arya et al, 2015). However, it is unclear what role  
538 endogenous expression levels of Antp might play, as Antp is not normally expressed in thoracic neural  
539 stem cells (Bello et al, 2003) and our enh1 reporters are not normally active in the thoracic domain (Fig  
540 4; Arya et al, 2015). Additionally, we note that AbdA is endogenously expressed at high levels in many  
541 cells that do not die and do not express the enh1 reporters, such as neurons (seen in Fig 2B). These  
542 observations suggest that additional factors are involved in determining the context-dependent effects  
543 of Antp and AbdA on the activity of the cell death pathway.

544

#### 545 **Implications for human disease**

546 Human heterozygous loss of function of Sox2 leads to Anophthalmia-Esophageal-Genital (AEG)  
547 syndrome, characterized by failed development or malformation of the eyes, neurocognitive  
548 impairments, esophageal-tracheal atresia and urogenital abnormalities (Williamson et al, 2006). In the  
549 developing vertebrate gut, Sox2 expression is restricted to anterior tissues and it is highly expressed in  
550 the endoderm of the esophagus, trachea and anterior stomach (Ishii et al, 1998; Williamson et al, 2006;  
551 Que et al, 2007; Hagey et al, 2018). A similar regional restriction is seen in the *Drosophila* gut, where  
552 *Dichaete* is expressed in the posterior gut tissue (Sánchez Soriano & Russell, 2000; Fig S14). In Sox2-  
553 hypomorphic mice, the foregut endoderm ectopically expresses the transcription factor and airway  
554 marker Nkx2.1, leading to failed separation of the developing esophageal and tracheal tubes, and mis-  
555 specification of the esophagus into trachea (Que et al, 2007). This suggests that the role of Sox2 in  
556 vertebrate foregut development is to maintain patterning and cell identity. Interestingly, it has been  
557 shown that the failure of hindgut development in *D<sup>87</sup>* embryos can be rescued by ectopic expression of  
558 *decapentaplegic (dpp)*, a TGF-beta homologue and marker of the central hindgut (Sánchez Soriano &  
559 Russell, 2000). This suggests a conserved role for *Dichaete* in promoting endodermal cell identity,  
560 although the expression compartments of *Dichaete* and Sox2 in the developing gut have diverged. We  
561 have found that hindgut development is rescued in the *D<sup>87</sup>,MM3* background, indicating that cell death

562 contributes to the hindgut defects upon loss of *Dichaete*. The ectopic expression of *dpp* in the hindgut  
563 of *D<sup>87</sup>* embryos may restore cell viability by re-activating endogenous endodermal patterning  
564 downstream of *Dichaete*.

565 Consistent with the failure of proper tissue development upon loss of function of Sox2, high levels  
566 of Sox2 are found in many human cancers at both transcript and protein levels. Of particular note is the  
567 observation of increased Sox2 expression in samples obtained from glioblastoma patients, and an  
568 association of high Sox2 levels with worse prognosis (Ben-Porath et al, 2008; Annovazzi et al, 2011;  
569 Alonso et al, 2011; Brennan et al, 2013; de la Rocha et al, 2014; Sathyan et al, 2015; reviewed in  
570 Garros-Regulez et al, 2016). Glioblastoma tumors are thought to be seeded and maintained by a  
571 subpopulation of glioma stem cells (GSCs), which show enrichment for Sox2 expression and whose  
572 continued proliferation and tumor-formation ability depends on Sox2 (Gangemi et al, 2009; Ikushima et  
573 al, 2009; Alonso et al, 2011; Hagerstrand et al, 2011; Suva et al, 2014). However, the contribution of  
574 cell death to the decreased proliferative state of GSCs upon Sox2 knockdown has not been measured.  
575 Gangemi et al (2009) state that no difference in TUNEL staining was observed upon silencing of Sox2  
576 in GSC cultures, in contrast to the observed effects of loss of Sox2 *in vivo* in mice (Favaro et al, 2009).  
577 As we noted in the introduction to this study, the role of apoptosis in driving observed phenotypes  
578 cannot be conclusively determined without including experimental measures to block cell death. For the  
579 first time, we have directly examined the contribution of cell death to phenotypes observed upon loss of  
580 *Dichaete*, and we find that multiple developmental defects observed in these mutant embryos can be  
581 rescued by preventing apoptosis. In addition, our observation that *Dichaete* overexpression can serve  
582 to inhibit activation of the cell death pathway in *Drosophila* offers a mechanism through which Sox2  
583 may promote tumorigenic activity.

584

585 **ACKNOWLEDGEMENTS:** The authors are grateful to Richa Arya, Seda Gyonyan and Tatevik  
586 Sarkissian for generating the enh1-dsRed and enh1-GFP constructs, as well as to the Bloomington  
587 *Drosophila* Stock Center for fly lines and the Developmental Studies Hybridoma Bank for antibodies.  
588 We would particularly like to thank Barbara Nambu and the lab of the late John Nambu for fly stocks  
589 and antibodies. This research was supported by the National Institute of Health R01GM110477,  
590 R21NS120141 and an MGH Interim support fund to KW.

591

## **REFERENCES:**

592 Aleksic, J., Ferrero, E., Fischer, B., Shen, S.P., Russell, S., 2013. The role of *Dichaete* in transcriptional  
593 regulation during *Drosophila* embryonic development. *BMC Genomics* 14, 861–878.

594

595 Alonso, M.M., Diez-Valle, R., Manterola, L., Rubio, A., Liu, D., Cortes-Santiago, N., Urquiza, L.,  
596 Jauregi, P., de Munain, A.L., Sampron, N., Aramburu, A., Tejada-Solís, S., Vicente, C., Odero, M.D.,  
597 Bandrés, E., García-Foncillas, J., Idoate, M.A., Lang, F.F., Fueyo, J., Gomez-Manzano, C., 2011.  
598 Genetic and Epigenetic Modifications of Sox2 Contribute to the Invasive Phenotype of Malignant  
599 Gliomas. PLoS ONE 6, e26740.

500

501 Annovazzi, L., Mellai, M., Caldera, V., Valente, G., Schiffer, D., 2011. SOX2 expression and  
502 amplification in gliomas and glioma cell lines. Cancer Genomics Proteomics 8, 139–147.

503

504 Arya, R., Gyonjyan, S., Harding, K., Sarkissian, T., Li, Y., Zhou, L., White, K., 2019. A Cut/cohesin axis  
505 alters the chromatin landscape to facilitate neuroblast death. Development 146, dev.166603.

506

507 Arya, R., Sarkissian, T., Tan, Y., White, K., 2015. Neural stem cell progeny regulate stem cell death in a  
508 Notch and Hox dependent manner. Cell Death and Differentiation 22, 1378–1387.

509

510 Avilion, A.A., Nicolis, S.K., Pevny, L.H., Perez, L., Vivian, N., Lovell-Badge, R., 2003. Multipotent cell  
511 lineages in early mouse development depend on SOX2 function. Genes Dev. 17, 126–140.

512

513 Bello, B.C., Hirth, F., Gould, A.P., 2003. A Pulse of the Drosophila Hox Protein Abdominal-A Schedules  
514 the End of Neural Proliferation via Neuroblast Apoptosis. Neuron 209–219.

515

516 Ben-Porath, I., Thomson, M., Carey, V.J., Ge, R., Bell, G.W., Regev, A., Weinberg, R.A., 2019. An  
517 embryonic stem cell-like gene expression signature in poorly differentiated aggressive human tumors.  
518 Nat. Genet. 40, 499–507.

519

520 Bonn, S., Zinzen, R.P., Girardot, C., Gustafson, E.H., Perez-Gonzalez, A., Delhomme, N., Ghavi-Helm,  
521 Y., Wilczyński, B., Riddell, A., Furlong, E.E.M., 2012. Tissue-specific analysis of chromatin state  
522 identifies temporal signatures of enhancer activity during embryonic development. Nat. Genet. 44, 148–  
523 156.

524

525 Boube, M., Faucher, C., Joulia, L., Cribbs, D.L., Bourbon, H.-M., 2000. Drosophila homologs of  
526 transcriptional mediator complex subunits are required for adult cell and segment identity specification.  
527 Genes Dev. 14, 2906–2917.

528

529 Boube, M., Hudry, B., Immarigeon, C., Carrier, Y., Bernat-Fabre, S., Merabet, S., Graba, Y., Bourbon,  
530 H.-M., Cribbs, D.L., 2014. Drosophila melanogaster Hox Transcription Factors Access the RNA  
531 Polymerase II Machinery through Direct Homeodomain Binding to a Conserved Motif of Mediator  
532 Subunit Med19. PLoS Genet 10, e1004303.

533

534 Bowman, S.K., Rolland, V., Betschinger, J., Kinsey, K.A., Emery, G., Knoblich, J.A., 2008. The Tumor  
535 Suppressors Brat and Numb Regulate Transit-Amplifying Neuroblast Lineages in Drosophila.  
536 Developmental Cell 14, 535–546.

537

538 Brennan, C.W., Verhaak, R.G.W., McKenna, A., Campos, B., Noushmehr, H., Salama, S.R., Zheng, S.,  
539 Chakravarty, D., Sanborn, J.Z., Berman, S.H., Beroukhim, R., Bernard, B., Wu, C.-J., Genovese, G.,  
540 Shmulevich, I., Barnholtz-Sloan, J., Zou, L., Vegesna, R., Shukla, S.A., Ciriello, G., Yung, W.K., Zhang,  
541 W., Sougnez, C., Mikkelsen, T., Aldape, K., Bigner, D.D., Van Meir, E.G., Prados, M., Sloan, A., Black,  
542 K.L., Eschbacher, J., Finocchiaro, G., Friedman, W., Andrews, D.W., Guha, A., Iacocca, M., O'Neill,

- 543 B.P., Foltz, G., Myers, J., Weisenberger, D.J., Penny, R., Kucherlapati, R., Perou, C.M., Hayes, D.N.,  
544 Gibbs, R., Marra, M., Mills, G.B., Lander, E., Spellman, P., Wilson, R., Sander, C., Weinstein, J.,  
545 Meyerson, M., Gabriel, S., Laird, P.W., Haussler, D., Getz, G., Chin, L., TCGA Research Network,  
546 2013. The somatic genomic landscape of glioblastoma. *Cell* 155, 462–477.
- 547  
548 Cenci, C., Gould, A., 2005. *Drosophila* Grainyhead specifies late programmes of neural proliferation by  
549 regulating the mitotic activity and Hox-dependent apoptosis of neuroblasts. *Development* 132, 3835–  
550 3845.
- 551  
552 Chai, J., Yan, N., Huh, J.R., Wu, J.-W., Li, W., Hay, B.A., Shi, Y., 2003. Molecular mechanism of  
553 Reaper-Grim-Hid-mediated suppression of DIAP1-dependent Dronc ubiquitination. *Nat Struct Biol* 10,  
554 892–898.
- 555  
556 Chen, P., Nordstrom, W., Gish, B., Abrams, J.M., 1996. grim, a novel cell death gene in *Drosophila*.  
557 *Genes Development* 1773–1782.
- 558  
559 Cusanovich, D.A., Reddington, J.P., Garfield, D.A., Daza, R.M., Aghamirzaie, D., Marco-Ferreres, R.,  
560 Pliner, H.A., Christiansen, L., Qiu, X., Steemers, F.J., Trapnell, C., Shendure, J., Furlong, E.E.M., 2018.  
561 The cis-regulatory dynamics of embryonic development at single-cell resolution. *Nature Publishing*  
562 *Group* 1–22.
- 563  
564 de la Rocha, A.M.A., Sampron, N., Alonso, M.M., Matheu, A., 2014. Role of SOX family of transcription  
565 factors in central nervous system tumors. *Am J Cancer Res* 4, 312–324.
- 566  
567 Dong, R., Jacobs, J.R., 1997. Origin and Differentiation of Supernumerary Midline Glia in *Drosophila*  
568 *Embryos Deficient for Apoptosis*. *Developmental Biology* 165–177.
- 569  
570 Elkins, T., Zinn, K., McAllister, L., Hoffman, F.M., Goodman, C.S., 1990. Genetic Analysis of a  
571 *Drosophila* Neural Cell Adhesion Molecule: Interaction of Fasciclin I and Abelson Tyrosine Kinase  
572 Mutations. *Cell* 60, 565–575.
- 573  
574 Favaro, R., Valotta, M., Ferri, A.L.M., Latorre, E., Mariani, J., Giachino, C., Lancini, C., Tosetti, V.,  
575 Ottolenghi, S., Taylor, V., Nicolis, S.K., 2009. Hippocampal development and neural stem cell  
576 maintenance require Sox2-dependent regulation of Shh. *Nat Neurosci* 1–11.
- 577  
578 Ferri, A.L.M., Cavallaro, M., Braidà, D., Di Cristofano, A., Canta, A., Vezzani, A., Ottolenghi, S.,  
579 Pandolfi, P.P., Sala, M., DeBiasi, S., Nicolis, S.K., 2004. Sox2 deficiency causes neurodegeneration  
580 and impaired neurogenesis in the adult mouse brain. *Development* 131, 3805–3819.
- 581  
582 Gangemi, R.M.R., Griffero, F., Marubbi, D., Perera, M., Capra, M.C., Malatesta, P., Ravetti, G.L., Zona,  
583 G.L., Daga, A., Corte, G., 2009. SOX2 Silencing in Glioblastoma Tumor-Initiating Cells Causes Stop of  
584 Proliferation and Loss of Tumorigenicity. *STEM CELLS* 27, 40–48.
- 585  
586 Garros-Regulez, L., Garcia, I., Carrasco-Garcia, E., Lantero, A., Aldaz, P., Moreno-Cugnon, L.,  
587 Arrizabalaga, O., Undabeitia, J., Torres-Bayona, S., Villanua, J., Ruiz, I., Egaña, L., Sampron, N.,  
588 Matheu, A., 2016. Targeting SOX2 as a Therapeutic Strategy in Glioblastoma. *Front Oncol* 6, 222.
- 589

- 590 Hägerstrand, D., He, X., Bradic Lindh, M., Hoefs, S., Hesselager, G., Ostman, A., Nistér, M., 2011.  
591 Identification of a SOX2-dependent subset of tumor- and sphere-forming glioblastoma cells with a  
592 distinct tyrosine kinase inhibitor sensitivity profile. *Neuro-oncology* 13, 1178–1191.  
593
- 594 Hagey, D.W., Klum, S., Kurtsdotter, I., Zaouter, C., Topcic, D., Andersson, O., Bergsland, M., Muhr, J.,  
595 2018. SOX2 regulates common and specific stem cell features in the CNS and endoderm derived  
596 organs. *PLoS Genet* 14, e1007224.  
597
- 598 Harding, K., White, K., 2018. *Drosophila* as a Model for Developmental Biology: Stem Cell-Fate  
599 Decisions in the Developing Nervous System. *J Dev Biol* 6, 25.  
700
- 701 Harding, K., White, K., 2019. Decoupling developmental apoptosis and neuroblast proliferation in  
702 *Drosophila*. *Developmental Biology* 1–8.  
703
- 704 Hay, B.A., Wolff, T., Rubin, G.M., 1994. Expression of baculovirus P35 prevents cell death in  
705 *Drosophila*. *Development* 2121–2129.  
706
- 707 Ikushima, H., Todo, T., Ino, Y., Takahashi, M., Miyazawa, K., Miyazono, K., 2009. Autocrine TGF-beta  
708 signaling maintains tumorigenicity of glioma-initiating cells through Sry-related HMG-box factors. *Cell*  
709 *Stem Cell* 5, 504–514.  
710
- 711 Ishii, Y., Rex, M., Scotting, P.J., Yasugi, S., 1998. Region-specific expression of chicken Sox2 in the  
712 developing gut and lung epithelium: regulation by epithelial-mesenchymal interactions. *Dev. Dyn.* 213,  
713 464–475.  
714
- 715 Ke, F.F.S., Vanyai, H.K., Cowan, A.D., Delbridge, A.R.D., Whitehead, L., Grabow, S., Czabotar, P.E.,  
716 Voss, A.K., Strasser, A., 2018. Embryogenesis and Adult Life in the Absence of Intrinsic Apoptosis  
717 Effectors BAX, BAK, and BOK. *Cell* 173, 1217–1218.e17.  
718
- 719 Keramari, M., Razavi, J., Ingman, K.A., Patsch, C., Edenhofer, F., Ward, C.M., Kimber, S.J., 2010.  
720 Sox2 is essential for formation of trophoctoderm in the preimplantation embryo. *PLoS ONE* 5, e13952.  
721
- 722 Khandelwal, R., Sipani, R., Govinda Rajan, S., Kumar, R., Joshi, R., 2017. Combinatorial action of  
723 Grainyhead, Extradenticle and Notch in regulating Hox mediated apoptosis in *Drosophila* larval CNS.  
724 *PLoS Genet* 13, e1007043.  
725
- 726 Kohwi, M., Doe, C.Q., 2013. Temporal fate specification and neural progenitor competence during  
727 development. *Nature Publishing Group* 14, 823–838.  
728
- 729 Lacin, H., Truman, J.W., 2016. Lineage mapping identifies molecular and architectural similarities  
730 between the larval and adult *Drosophila* central nervous system. *eLife* 1–28.  
731
- 732 Lisi, S., Mazzon, I., White, K., 2000. Diverse Domains of THREAD/DIAP1 Are Required to Inhibit  
733 Apoptosis Induced by REAPER and HID in *Drosophila*. *Genetics* 154, 669–678.  
734
- 735 Ma, Y., Certel, K., Gao, Y., Niemitz, E., Mosher, J., Mukherjee, A., Mutsuddi, M., Huseinovic, N.,  
736 Crews, S.T., Johnson, W.A., Nambu, J.R., 2000. Functional interactions between *Drosophila*  
737 bHLH/PAS, Sox, and POU transcription factors regulate CNS midline expression of the slit gene.  
738 *Journal of Neuroscience* 20, 4596–4605.

739

740 Maurange, C., Cheng, L., Gould, A.P., 2008. Temporal Transcription Factors and Their Targets  
741 Schedule the End of Neural Proliferation in *Drosophila*. *Cell* 133, 891–902.

742

743 modENCODE Consortium, 2010. Identification of Functional Elements and Regulatory Circuits by  
744 *Drosophila* modENCODE. *Science* 330, 1787–1797.

745

746 Nambu, J.R., Lewis, J.O., Wharton, K.A., Crews, S.T., 1991. The *Drosophila* single-minded Gene  
747 Encodes a Helix-Loop-Helix Protein That Acts as a Master Regulator of CNS Midline Development. *Cell*  
748 67, 1157–1167.

749

750 Nambu, P.A., Nambu, J.R., 1996. The *Drosophila* fish-hook gene encodes a HMG domain protein  
751 essential for segmentation and CNS development. *Development* 1–9.

752

753 Nègre, N., Brown, C.D., Ma, L., Bristow, C.A., Miller, S.W., Wagner, U., Kheradpour, P., Eaton, M.L.,  
754 Loriaux, P., Sealton, R., Li, Z., Ishii, H., Spokony, R.F., Chen, J., Hwang, L., Cheng, C., Auburn, R.P.,  
755 Davis, M.B., Domanus, M., Shah, P.K., Morrison, C.A., Zieba, J., Suchy, S., Senderowicz, L., Victorsen,  
756 A., Bild, N.A., Grundstad, A.J., Hanley, D., MacAlpine, D.M., Mannervik, M., Venken, K., Bellen, H.,  
757 White, R., Gerstein, M., Russell, S., Grossman, R.L., Ren, B., Posakony, J.W., Kellis, M., White, K.P.,  
758 2011. A cis-regulatory map of the *Drosophila* genome. *Nature* 1–5.

759

760 Overton, P.M., Meadows, L.A., Urban, J., Russell, S., 2002. Evidence for differential and redundant  
761 function of the Sox genes *Dichaete* and *SoxN* during CNS development in *Drosophila*. *Development*  
762 129, 4219–4228.

763

764 Peterson, C., Carney, G.E., Taylor, B.J., White, K., 2002. *reaper* is required for neuroblast apoptosis  
765 during *Drosophila* development. *Development* 1467–1476.

766

767 Prince, F., Katsuyama, T., Oshima, Y., Plaza, S., Resendez-Perez, D., Berry, M., Kurata, S., Gehring,  
768 W.J., 2008. The YPWM motif links *Antennapedia* to the basal transcriptional machinery. *Development*  
769 1669–1679.

770

771 Prokop, A., Bray, S., Harrison, E., Technau, G.M., 1998. Homeotic regulation of segment-specific  
772 differences in neuroblast numbers and proliferation in the *Drosophila* central nervous system.  
773 *Mechanisms of Development* 99–110.

774

775 Que, J., Okubo, T., Goldenring, J.R., Nam, K.-T., Kurotani, R., Morrissey, E.E., Taranova, O., Pevny,  
776 L.H., Hogan, B.L.M., 2007. Multiple dose-dependent roles for Sox2 in the patterning and differentiation  
777 of anterior foregut endoderm. *Development* 134, 2521–2531.

778

779 Reddington, J.P., Garfield, D.A., Sigalova, O.M., Calviello, A.K., Marco-Ferreres, R., Girardot, C.,  
780 Viales, R.R., Degner, J.F., Ohler, U., Furlong, E.E.M., 2020. Lineage-Resolved Enhancer and Promoter  
781 Usage during a Time Course of Embryogenesis. *Developmental Cell* 1–27.

782

783 Rezsöházy, R., Saurin, A.J., Maurel-Zaffran, C., Graba, Y., 2015. Cellular and molecular insights into  
784 Hox protein action. *Development* 1212–1227.

785

- 786 Rothberg, J.M., Jacobs, J.R., Goodman, C.S., Artavanis-Tsakonas, S., 1990. slit: an extracellular  
787 protein necessary for development of midline glia and commissural axon pathways contains both EGF  
788 and LRR domains. *Genes Dev.* 4, 2169–2187.  
789
- 790 Ryoo, H.D., Bergmann, A., Gonen, H., Ciechanover, A., Steller, H., 2002. Regulation of *Drosophila*  
791 IAP1 degradation and apoptosis by reaper and ubcD1. *Nat Cell Biol* 4, 432–438.  
792
- 793 Sánchez Soriano, N., Russell, S., 1998. The *Drosophila* SOX-domain protein Dichaete is required for  
794 the development of the central nervous system midline. *Development* 125, 3989–3996.  
795
- 796 Sánchez Soriano, N., Russell, S., 2000. Regulatory Mutations of the *Drosophila* Sox Gene Dichaete  
797 Reveal New Functions in Embryonic Brain and Hindgut Development. *Developmental Biology* 1–15.  
798
- 799 Sarkar, A., Hochedlinger, K., 2013. The Sox Family of Transcription Factors: Versatile Regulators of  
300 Stem and Progenitor Cell Fate. *Stem Cell* 12, 15–30.  
301
- 302 Sathyan, P., Zinn, P.O., Marisetty, A.L., Liu, B., Kamal, M.M., Singh, S.K., Bady, P., Lu, L., Wani, K.M.,  
303 Veo, B.L., Gumin, J., Kassem, D.H., Robinson, F., Weng, C., Baladandayuthapani, V., Suki, D.,  
304 Colman, H., Bhat, K.P., Sulman, E.P., Aldape, K., Colen, R.R., Verhaak, R.G.W., Lu, Z., Fuller, G.N.,  
305 Huang, S., Lang, F.F., Sawaya, R., Hegi, M., Majumder, S., 2015. Mir-21–Sox2 Axis Delineates  
306 Glioblastoma Subtypes with Prognostic Impact. *The Journal of Neuroscience* 35, 15097–15112.  
307
- 308 Scholz, H., Sadlowski, E., Klaes, A., Klämbt, C., 1997. Control of midline glia development in the  
309 embryonic *Drosophila* CNS. *Mechanisms of Development* 79–91.  
310
- 311 Song, Y., Lu, B., 2011. Regulation of cell growth by Notch signaling and its differential requirement in  
312 normal vs. tumor-forming stem cells in *Drosophila*. *Genes Dev.* 25, 2644–2658.  
313
- 314 Suvà, M.L., Rheinbay, E., Gillespie, S.M., Patel, A.P., Wakimoto, H., Rabkin, S.D., Riggi, N., Chi, A.S.,  
315 Cahill, D.P., Nahed, B.V., Curry, W.T., Martuza, R.L., Rivera, M.N., Rossetti, N., Kasif, S., Beik, S.,  
316 Kadri, S., Tirosh, I., Wortman, I., Shalek, A.K., Rozenblatt-Rosen, O., Regev, A., Louis, D.N., Bernstein,  
317 B.E., 2014. Reconstructing and reprogramming the tumor-propagating potential of glioblastoma stem-  
318 like cells. *Cell* 157, 580–594.  
319
- 320 Suzuki, Y., Nakabayashi, Y., Takahashi, R., 2001. Ubiquitin-protein ligase activity of X-linked inhibitor of  
321 apoptosis protein promotes proteasomal degradation of caspase-3 and enhances its anti-apoptotic  
322 effect in Fas-induced cell death. *Proceedings of the National Academy of Sciences* 98, 8662–8667.  
323
- 324 Takashima, S., Murakami, R., 2001. Regulation of pattern formation in the *Drosophila* hindgut by wg,  
325 hh, dpp, and en. *Mechanisms of Development* 79–90.  
326
- 327 Tan, Y., Yamada-Mabuchi, M., Arya, R., St Pierre, S., Tang, W., Tosa, M., Brachmann, C., White, K.,  
328 2011. Coordinated expression of cell death genes regulates neuroblast apoptosis. *Development* 138,  
329 2197–2206.  
330
- 331 Tomancak, P., Beaton, A., Weiszmann, R., Kwan, E., Shu, S., Lewis, S.E., Richards, S., Ashburner, M.,  
332 Hartenstein, V., Celniker, S.E., Rubin, G.M., 2002. Systematic determination of patterns of gene  
333 expression during *Drosophila* embryogenesis. *Genome Biol* 3, RESEARCH0088–14.  
334

- 335 White, K., Grether, M.E., Abrams, J.M., Young, L., Farrell, K., Steller, H., 1994. Genetic Control of  
336 Programmed Cell Death in *Drosophila*. *Science* 264, 677–683.  
337
- 338 Williamson, K.A., Hever, A.M., Rainger, J., Rogers, R.C., Magee, A., Fiedler, Z., Keng, W.T., Sharkey,  
339 F.H., McGill, N., Hill, C.J., Schneider, A., Messina, M., Turnpenny, P.D., Fantes, J.A., van Heyningen,  
340 V., FitzPatrick, D.R., 2006. Mutations in SOX2 cause anophthalmia-esophageal-genital (AEG)  
341 syndrome. *Hum Mol Genet* 15, 1413–1422.  
342
- 343 Wing, J.P., Schwartz, L.M., Nambu, J.R., 2001. The RHG motifs of *Drosophila* Reaper and Grim are  
344 important for their distinct cell death-inducing abilities. *Mechanisms of Development* 102, 193–203.  
345
- 346 Wing, J.P., Zhou, L., Schwartz, L.M., Nambu, J.R., 1998. Distinct cell killing properties of the *Drosophila*  
347 reaper, head involution defective, and grim genes. *Cell Death and Differentiation* 930–939.  
348
- 349 Yang, Y., Fang, S., Jensen, J.P., Weissman, A.M., Ashwell, J.D., 2000. Ubiquitin Protein Ligase Activity  
350 of IAPs and Their Degradation in Proteasomes in Response to Apoptotic Stimuli. *Science* 288, 874–  
351 877.  
352
- 353 Yokokura, T., Dresnek, D., Huseinovic, N., Lisi, S., Abdelwahid, E., Bangs, P., White, K., 2004.  
354 Dissection of DIAP1 Functional Domains via a Mutant Replacement Strategy. *Journal of Biological*  
355 *Chemistry* 279, 52603–52612.  
356
- 357 Yoo, S.J., Huh, J.R., Muro, I., Yu, H., Wang, L., Wang, S.L., Feldman, R.M.R., Clem, R.J., Muller, H.-  
358 A.J., Hay, B.A., 2002. Hid, Rpr and Grim negatively regulate DIAP1 levels through distinct mechanisms.  
359 *Nat Cell Biol* 4, 416–424.  
360
- 361 Zachariou, A., Tenev, T., Goyal, L., Agapite, J., Steller, H., Meier, P., 2003. IAP-antagonists exhibit  
362 non-redundant modes of action through differential DIAP1 binding. *The EMBO Journal* 22, 6642–6652.  
363
- 364 Zacharioudaki, E., Magadi, S.S., Delidakis, C., 2012. bHLH-O proteins are crucial for *Drosophila*  
365 neuroblast self-renewal and mediate Notch-induced overproliferation. *Development* 139, 1258–1269.  
366
- 367 Zhao, G., Skeath, J.B., 2002. The Sox-domain containing gene *Dichaete/fish-hook* acts in concert with  
368 *vnd* and *ind* to regulate cell fate in the *Drosophila* neuroectoderm. *Development* 129, 1165–1174.  
369
- 370 Zhou, L., Hashimi, H., Schwartz, L.M., Nambu, J.R., 1995. Programmed cell death in the *Drosophila*  
371 central nervous system midline. *Current Biology* 5, 784–790.  
372
- 373 Zouaz, A., Auradkar, A., Delfini, M.C., Macchi, M., Barthez, M., Ela Akoa, S., Bastianelli, L., Xie, G.,  
374 Deng, W.-M., Levine, S.S., Graba, Y., Saurin, A.J., 2017. The Hox proteins Ubx and AbdA collaborate  
375 with the transcription pausing factor M1 BPTF to regulate gene transcription. *The EMBO Journal* 36, 2887–  
376 2906.  
377



## FIGURE LEGENDS

378 **Figure 1. Dichaete is sufficient to inhibit abdominal neural stem cell apoptosis. A)** Stage 17  
379 embryos from *wor-GAL4,UAS-NLS-dsRed* (hereafter *wor>dsRed*) crossed to *luc-RNAi* or *UAS-D* and  
380 stained with anti-Dpn to visualize neural stem cells. Images are maximum projections through the VNC.  
381 **B)** Quantification of neural stem cell survival shown in **A**, n=3 hemisegments from 3 embryos per  
382 genotype. **C)** Quantification of abdominal neural stem cells in stage 14 embryos stained with anti-Dpn.  
383 n=3 hemisegments from 3 embryos per genotype. **D)** Abdominal NB3-5 dsRed+ progeny clusters in  
384 stage 17 embryos from *UAS-NLS-dsRed; VAcht-GAL4* flies crossed to indicated genotypes, stained  
385 with anti-Dpn. Images are maximum projections through the dsRed clusters. **E)** Quantification of Dpn+  
386 cells shown in **D**, n=3 clusters from 3 embryos per genotype. **F)** Quantification of G2-quiescent  
387 (G2Q)/cycB+ and G0-quiescent (G0)/cycB- neural stem cell populations in stage 17 embryos. n=2  
388 thoracic or 3 abdominal hemisegments from 3 embryos per genotype.

389  
390 **Figure 2. AbdA, not Grh or D, distinguishes doomed abdominal neural stem cells. A)**  
391 Hemisegment map of neural stem cells with driver expression patterns indicated (from Lacin & Truman  
392 2016; Harding & White 2019). **B)** Temporal dynamics of AbdA expression in the surviving neural stem  
393 cell NB3-5 (left; *VAcht>dsRed*) and the doomed neural stem cell NB5-7 (right; *calx>dsRed*). Neural  
394 stem cells are identified within reporter embryos by co-expression of Dpn and nuclear dsRed. Images  
395 are single confocal slices through the middle of the nuclear Dpn signal. **C-E)** Quantification of AbdA (**C**),  
396 D (**D**) and Grh (**E**) expression in neural stem cells during embryonic stages 13-17. Red (doomed cell)  
397 and green (surviving cell) bars represent survival frequency for each neural stem cell at a given  
398 embryonic stage (*VAcht>dsRed* st 13 n=10 embryos, st 14 n=17, st 15 n=20, st 16 n=14, st 17 n=19;  
399 *calx>dsRed* st 13 n=13 embryos, st 14 n=12, st 15 n=22, st 16 n=13, st 17 n=10; *abdB>dsRed* st 13  
400 n=12 embryos, st 14 n=11, st 15 n=10, st 16 n=7, st 17 n=13). The dotted line in **C** indicates the highest  
401 level of AbdA measured in either surviving neural stem cell.

402  
403 **Figure 3. Dichaete downregulates *grim* and *rpr* transcription. A)** Stage 15 embryos from  
404 *dcr2,PCNA-GFP;wor-GAL4* crossed to the indicated genotypes, stained for PCNA-GFP with RNA-FISH  
405 for *grim* transcript. Images are maximum projections through the VNC. **B)** Quantification of *grim*  
406 transcript intensity within PCNA-GFP+ cells shown in **A**. Values were measured in 3 abdominal  
407 segments of  $\geq 2$  embryos (*wor>luc-RNAi* st 14 n=227 cells, st 15 n=150, st 16 n=130; *wor>D* st 14  
408 n=138, st 15 n=96, st 16 n=115; *wor>p35* st 14 n=203, st 15 n=128, st 16 n=86). Qualitative expression  
409 assignments are indicated by data point color: red – high expression, orange – low expression, black –  
410 no expression. **C)** Stage 14 embryos stained for PCNA-GFP with RNA-FISH for *rpr* transcript. Images  
411 are maximum projections through the VNC. **D)** Quantification of *rpr* transcript intensity shown in **C**,  
412 analysis as in **B**. (*wor>luc-RNAi* st 14 n=228 cells, st 15 n=194, st 16 n=187; *wor>D* st 14 n=323, st 15  
413 n=192, st 16 n=158).

414  
415 **Figure 4. Dichaete regulates reporters of the *enh1* cell death enhancer. A)** Stage 17 embryos from  
416 *wor>dsRed;enh1(b+c)-GFP* crossed to the indicated genotypes, stained with anti-GFP to visualize  
417 *enh1(b+c)-GFP* reporter expression. The abdominal VNC is outlined with a white dashed line. Images  
418 are maximum projections through the VNC. **B)** Quantification of *enh1(b+c)-GFP* expression in Dpn+  
419 abdominal neural stem cells at stage 17. n=3 hemisegments from 3 embryos per genotype. **C)** Stage  
420 14 and 16 *enh1-dsRed;;D<sup>87</sup>/TM3,GFP* or *enh1-dsRed;;D<sup>87</sup>/D<sup>87</sup>* embryos stained with anti-dsRed. The  
421 thoracic region is indicated with a straight line and the abdominal region is outlined with a dashed line.  
422 Images are maximum projections.

423

924 **Figure 5. Midline glia death is *MM3*- and *Dichaete*-independent. A)** Stage 17 embryos stained with  
925 anti-Slit to visualize midline glia clusters. Images are maximum projections through the Slit signal. **B)**  
926 Quantification of Slit+ cells within each midline cluster, shown in **A**. n=3 clusters from 6 (*Yw*) or 3 (*grim*  
927 *rpr/MM2* and *MM3*) embryos. **C)** Stage 17 embryos from *sim-GAL4;UAS-NLS-dsRed* crossed to the  
928 indicated genotypes, stained with anti-Slit. Images are maximum projections through the Slit signal. **D)**  
929 Quantification of Slit+dsRed+ nuclei per midline cluster, shown in **C**. n=3 clusters from 4 embryos per  
930 genotype.

931  
932 **Figure 6. *Dichaete* blocks cell death downstream of pro-apoptotic factors *AbdA* and *Grh*. A)**  
933 Stage 17 embryos from *wor>dsRed* or *UAS-D;wor>dsRed/TM6B,tubGAL80* crossed to *luc-RNAi*, *UAS-*  
934 *AbdA::HA* or *UAS-Grh*, stained with anti-Dpn to visualize neural stem cells. Images are maximum  
935 projections through the VNC. **B)** Quantification of neural stem cell survival in abdominal hemisegments  
936 as shown in **A**, n=3 abdominal hemisegments of  $\geq 1$  embryos. **C)** Model for role of *Dichaete* in neural  
937 stem cell apoptosis. *Dichaete* overexpression inhibits cell death at least in part by preventing activation  
938 of the cell death enhancer, *enh1*, by *AbdA* and *Grh*. Inhibition of *enh1* then blocks downstream  
939 transcriptional activation of the cell death genes *grim* and *rpr*.

940  
941 **Figure 7. Deletion of cell death regulatory region rescues *D<sup>87</sup>* central nervous system defects. A)**  
942 Stage 17 embryos stained with anti-Dpn to visualize neural stem cells. Images are maximum  
943 projections through the VNC. **B)** Quantification of abdominal neural stem cell survival as shown in **A**.  
944 Dpn+ cells were counted in hemi-abdomens as the abdominal segmentation defects in *D<sup>87</sup>*  
945 backgrounds preclude accurate hemisegment analysis at this stage. n $\geq 3$  embryos per genotype. **C)**  
946 Stage 16 embryos stained with anti-axons to visualize axonal tracts. Images are maximum projections  
947 through the axons signal. **D)** Stage 14 embryos stained with anti-Slit to visualize midline glia clusters.  
948 Images are maximum projections through the Slit signal.

949  
950 **Figure 8. Multiple tissue defects of *D<sup>87</sup>* are rescued by blocking *MM3*-dependent cell death. A)**  
951 Stage 13 embryos stained with anti-En to visualize posterior segment borders. Images are maximum  
952 projections. **B)** Quantification of En fluorescent intensity along 9 stripes as seen in **A**. Traces are  
953 average values from 4 embryos per genotype, left-right X-position is anterior-posterior. **C)** Stage 14  
954 embryos stained with anti-En to visualize the developing hindgut. Images are maximum projections  
955 through the En signal. The loss of En staining in the hindgut of *D<sup>87</sup>* embryos as seen here has also  
956 been noted previously (Sanchez-Soriano & Russell, 2000). **D)** Quantification of hindgut length as  
957 shown in **C**, measured from the anterior point of the En+ posterior spiracles to the farthest anterior point  
958 of En signal. n=3-4 embryos per genotype. **E)** Model figure for the role of *Dichaete* in regulating  
959 activation of cell death through *enh1*. The apoptotic death of doomed neural stem cells is triggered by  
960 expression of *AbdA*, whereas surviving neural stem cells do not express *AbdA* and are therefore  
961 retained during post-embryonic development. The presence of ectopic *D* in *wor>D* embryos prevents  
962 the normal activation of *enh1* by high levels of *AbdA* in doomed neural stem cells, leading to an  
963 increase in neural stem cell survival. Loss of *Dichaete* function allows precocious activation of *enh1* in  
964 tissues where *AbdA* is expressed, whereas loss of *Dichaete* does not result in significant cell death in  
965 the absence of *AbdA* expression.

966  
967  
968 **Figure S1. *Dichaete*-rescued neural stem cells do not express markers of differentiation. A)**  
969 Stage 16 embryos from *wor>dsRed* crossed to *luc-RNAi* or *UAS-D*, stained with anti-Dpn to visualize  
970 neural stem cells and anti-Repo to visualize glial nuclei. Images are single confocal slices. **B)** Stage 16  
971 from *wor>dsRed* crossed to *luc-RNAi* or *UAS-D*, stained with anti-Dpn to visualize neural stem cells  
972 and anti-elav to visualize neuronal nuclei. Images are single confocal slices.

373

374

**Figure S2. Repeated independent measures of protein expression in NB6-2 show positive correlation.** Average intensity measures of AbdA, Grh and D at each developmental stage for NB6-2<sup>a</sup> (*abdB-GAL4*) and NB6-2<sup>b</sup> (*calx-GAL4*) were paired and plotted against each other. A Pearson correlation  $r^2$  value of 0.4561 with a p-value of 0.0459 were obtained, indicating a significant positive relationship between our repeated measures of protein expression in the same neural stem cell across multiple embryos using two independent driver lines.

380

381

**Figure S3. GrhGFP and Dichaete are co-expressed in post-embryonic abdominal neural stem cells.** **A)** CNS were dissected from *Grh.GFP/+* wandering L3 larvae and stained with anti-GFP and anti-Grh to determine the extent of overlap between tagged and endogenous proteins in the brain. **B)** Stage 17 *Grh.GFP/+* embryo stained with anti-GFP, anti-D and anti-Dpn to visualize neural stem cells.

385

386

**Figure S4. Dichaete downregulates *grim* and *rpr* transcription.** **A)** Quantification of Dpn expression in PCNA-GFP+ cells in *wor>luc-RNAi* and *wor>D* embryos at stages 14 & 15. **B)** Quantification of proportion of PCNA-GFP+ cells with GrimDIG signal >1000AU at stages 14-16. This threshold was determined using the qualitative expression assignments shown in Fig 2B&D, as all cells with GrimDIG >1000AU were assigned as having high expression levels. **C)** Quantification of RprDIG signal as in **B**.

390

391

392

**Figure S5. AbdA is expressed at higher levels in *enh1-GFP+* neural stem cells compared to *enh1-GFP-* neural stem cells.** **A)** Quantification of AbdA protein expression in Dpn+ cells, categorized as *enh1-GFP+* or *enh1-GFP-*. **B)** Quantification of Grh protein expression, as in **A**. **C)** Quantification of D protein expression, as in **A**.

396

397

**Figure S6. Dichaete is co-expressed with Antp and AbdA in the neuroectoderm in early embryos.** **A)** *Yw* embryos were stained with anti-Antp and anti-D, images are single confocal slices. **B)** *Yw* embryos were stained with anti-AbdA and anti-D, images are single confocal slices.

399

400

401

**Figure S7. Grh and AbdA are not misregulated in D87 mutant embryos.** **A)** Stage 15 embryos from the *D<sup>87</sup>/TM3,GFP* stock stained with anti-Grh. GFP staining (not shown) was used to identify *D<sup>87</sup>/D<sup>87</sup>* mutant embryos. **B)** Stage 15 embryos as above, stained with anti-AbdA. No ectopic expression in the thorax is seen in *D<sup>87</sup>/D<sup>87</sup>* mutant embryos.

403

404

405

**Figure S8. Dichaete overexpression downregulates Grh and AbdA protein expression.** **A)** Quantification of AbdA expression in Dpn+ cells in embryos from *wor>dsRed* crossed to the indicated genotypes. **B)** Quantification of Grh expression in Dpn+ cells in *wor>luc-RNAi* and *wor>D* embryos. **C)** Quantification of abdominal neural stem cell survival at stage 17 in *wor>luc-RNAi*, *wor>D* and *wor>AbdA-RNAi* embryos.

408

409

410

411

**Figure S9. AbdA and Grh are sufficient to kill thoracic neural stem cells.** Quantification of neural stem cell survival in 2 thoracic hemisegments in embryos from *wor>dsRed* crossed to the indicated genotypes. *UAS-Grim* is included as a positive control.

413

414

415

**Figure S10. AbdA and Grh do not kill midline glia, and AbdA is not required for their death.** **A)** Stage 17 embryos from *sim>dsRed* crossed to the indicated genotypes, stained with anti-Slit. Images are maximum projections through the Slit signal. **B)** Quantification of Slit+dsRed+ nuclei per midline cluster, shown in **A**. n=3 clusters from 3 embryos per genotype. **C)** Stage 17 embryos from *sim>dsRed* crossed to the indicated genotypes, stained with anti-Slit. Images are maximum projections through the

418

419

420

021 Slit signal. **D)** Quantification of Slit+dsRed+ nuclei per midline cluster, shown in **B**. n=3 clusters from 3  
022 embryos per genotype.

023

024 **Figure S11. Early abdominal neural stem cell loss in *D<sup>87</sup>* mutants is rescued by MM3. A)**

025 Quantification of abdominal neural stem cell numbers at stage 14, determined by anti-Dpn and anti-  
026 AbdA staining. n=3 hemisegments from  $\geq 2$  embryos per genotype. **B)** Quantification of thoracic neural  
027 stem cell numbers at stage 14, determined by anti-Dpn and anti-AbdA staining. n=2 hemisegments  
028 from 2 embryos per genotype.

029

030 **Figure S12. AbdA is expressed along the midline of early embryos. A)** Stage 11 *Yw* embryo

031 stained with anti-Slit and anti-AbdA, image is a single confocal slice. **B)** Stage 15 *Yw* embryo, as in **A**.

032

033 **Figure S13. Ectopic caspase activation in *D<sup>87</sup>* mutant embryos. A)** GFP+ control embryo at stage  
034 10/11 stained with anti-En and anti-cDcp1, image is a maximum projection. **B)** *D<sup>87</sup>* mutant embryo at  
035 stage 10/11, as in **A**.

036

037 **Figure S14. Dichaete and AbdA are co-expressed in the hindgut primordium.** Stage 10 *Yw*  
038 embryo stained with anti-D and anti-AbdA, the hindgut primordium is marked by high Dichaete  
039 expression and outlined with a dashed line. Image is a single confocal slice.

040

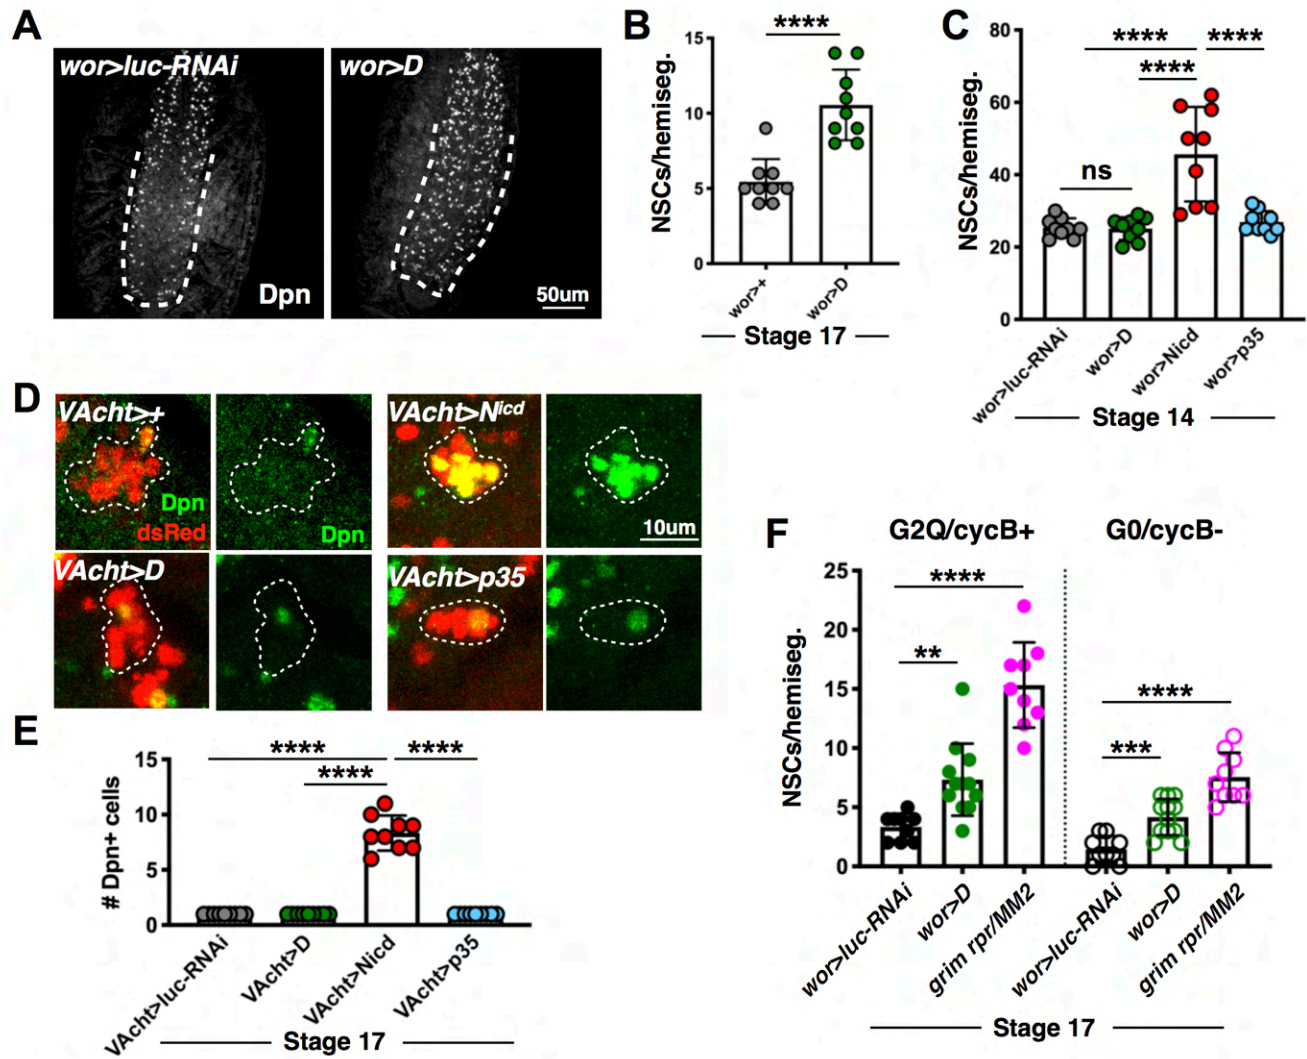

Figure 1

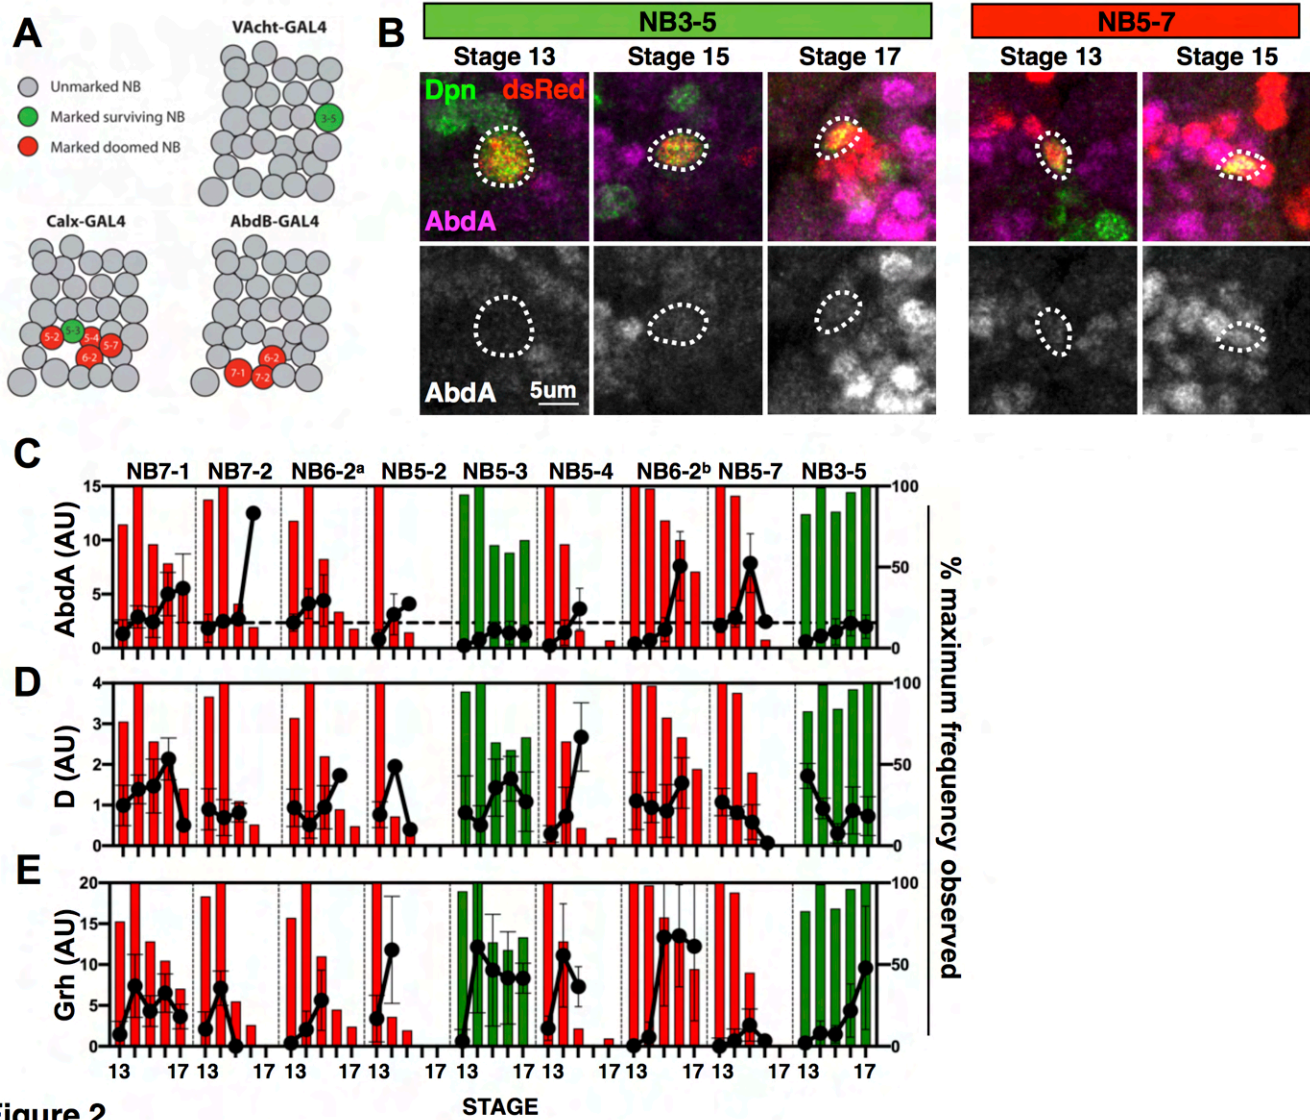

Figure 2

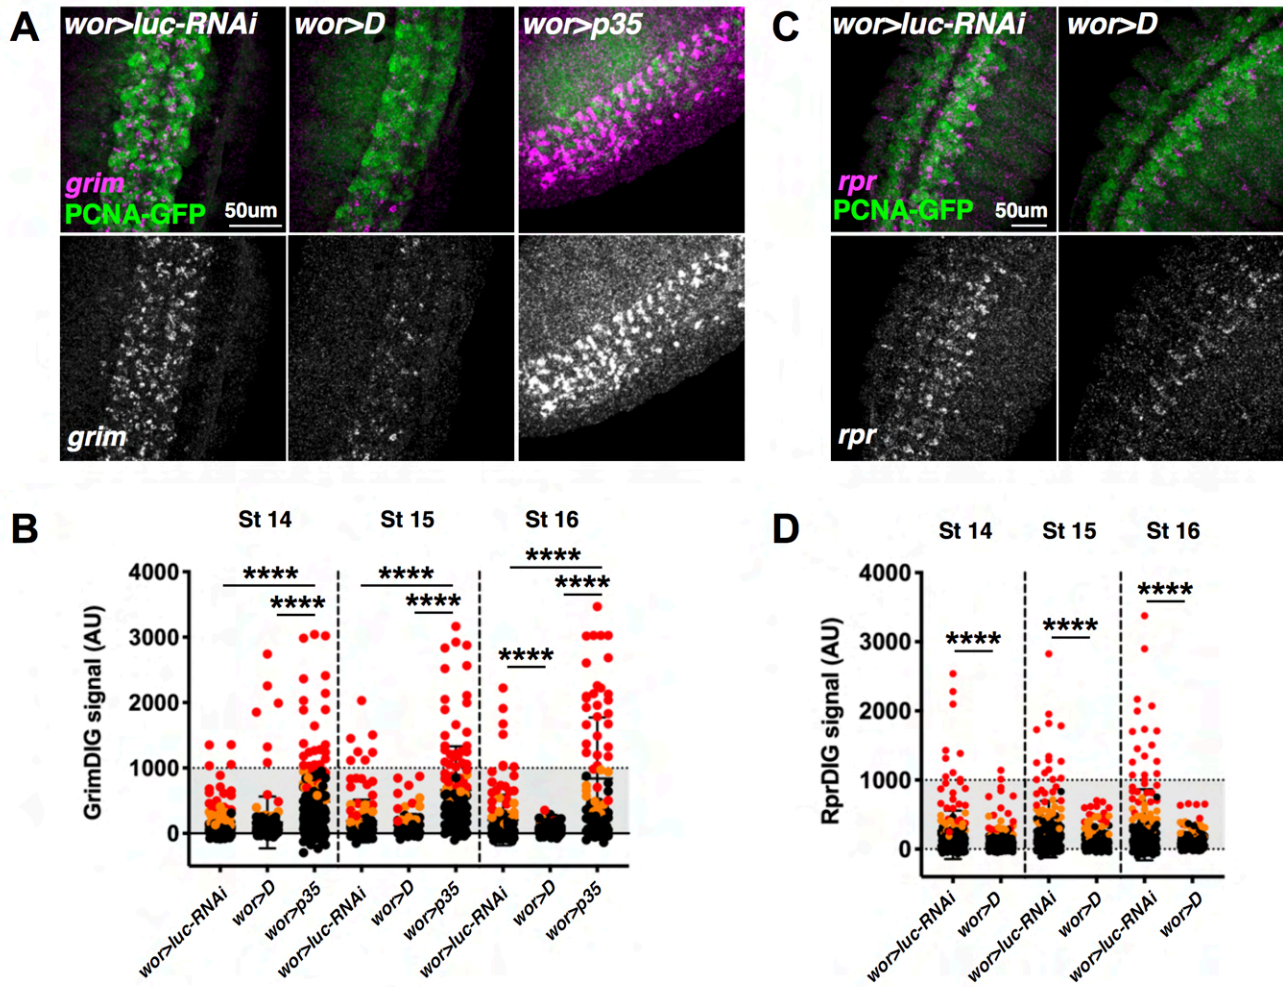

Figure 3

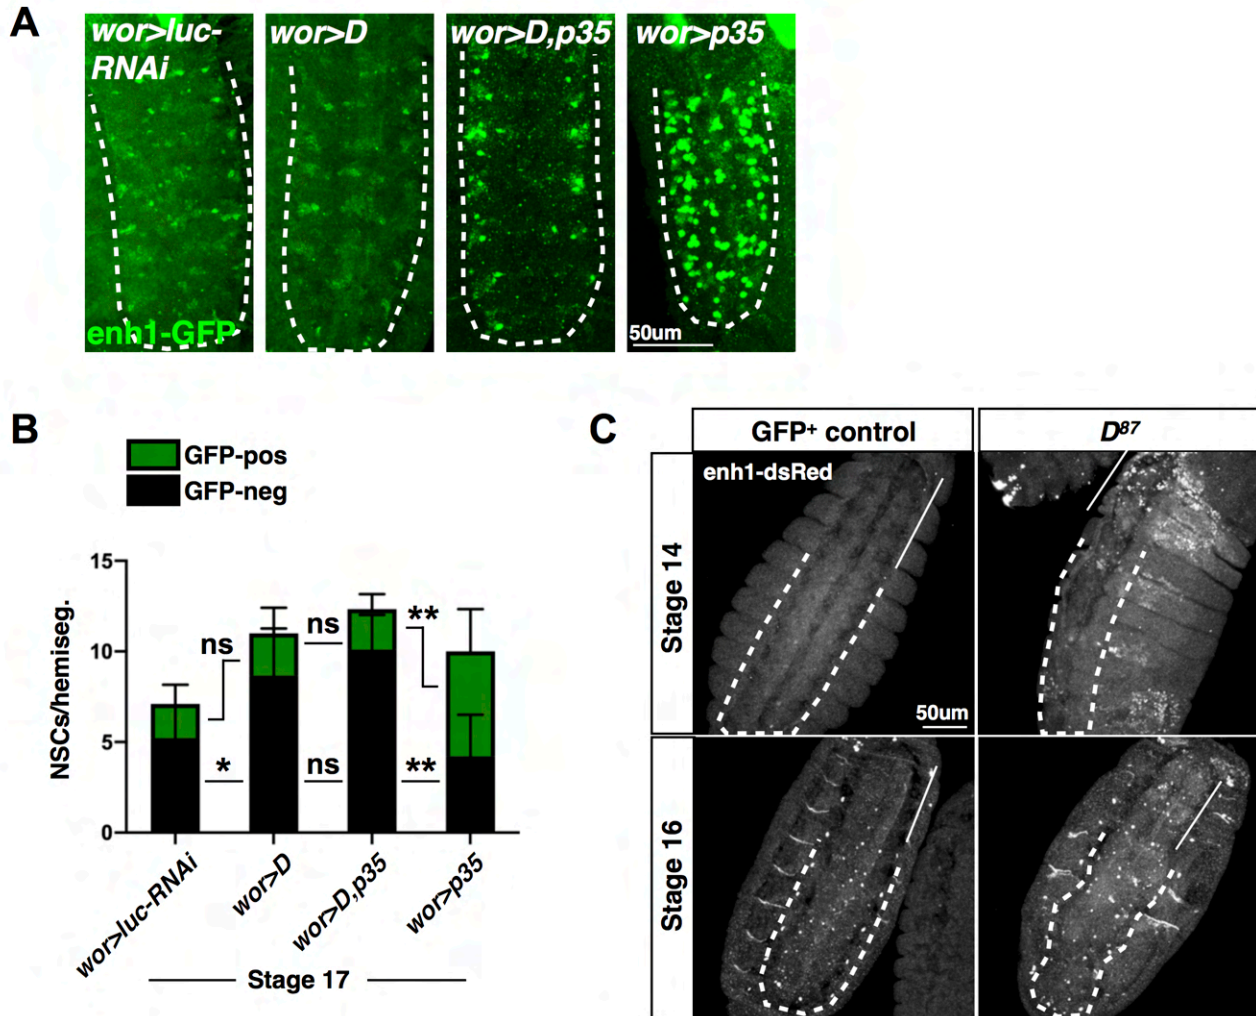

Figure 4



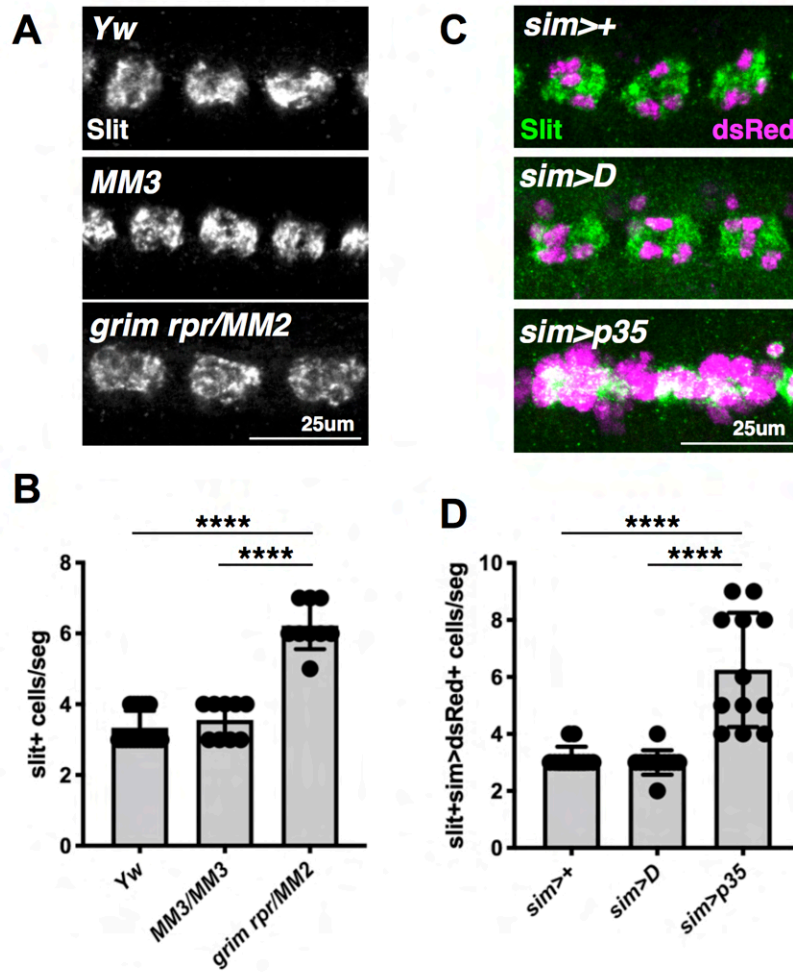

Figure 5

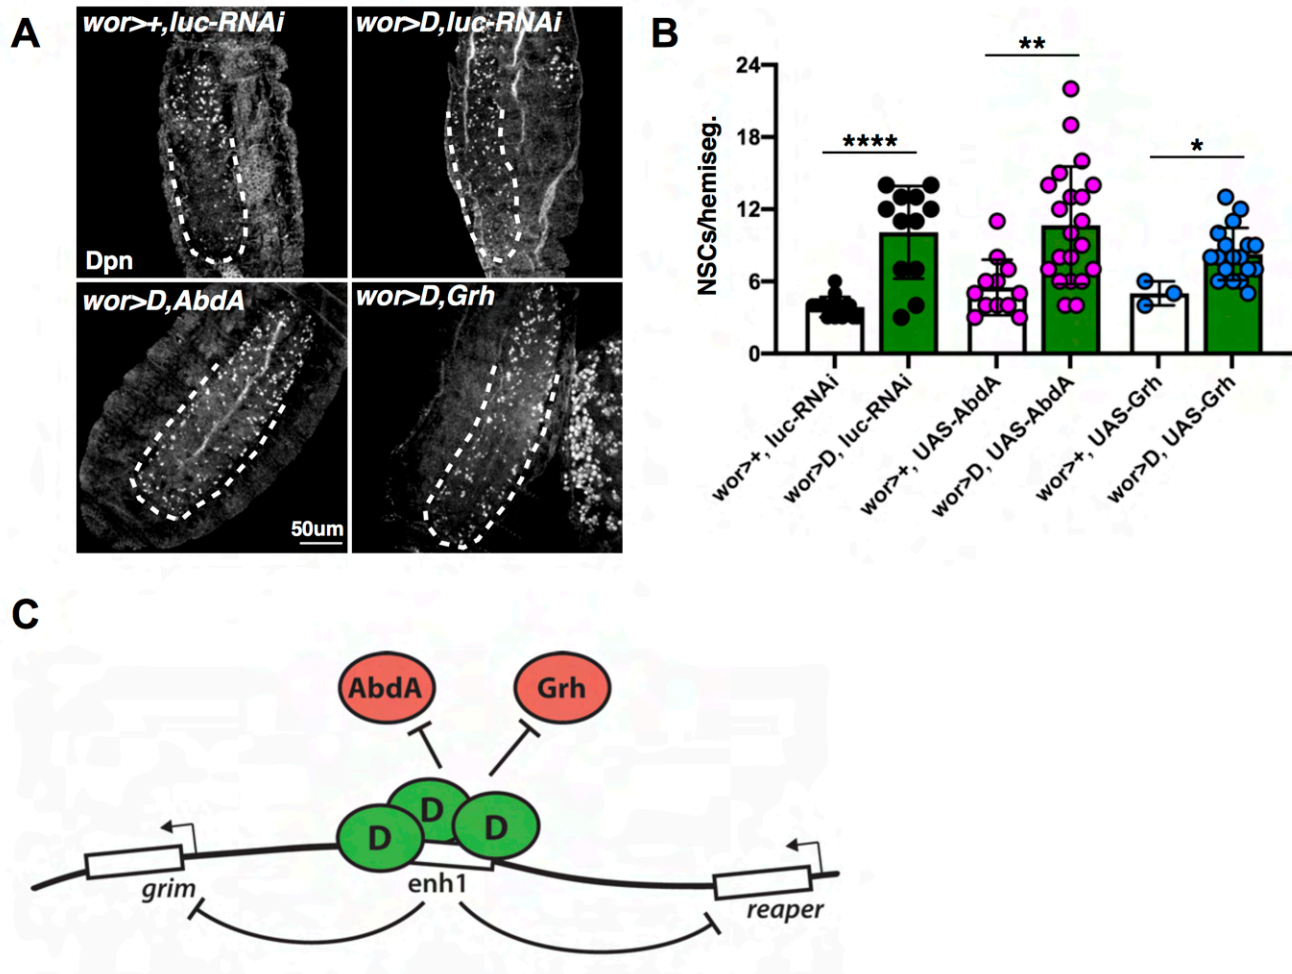

Figure 6

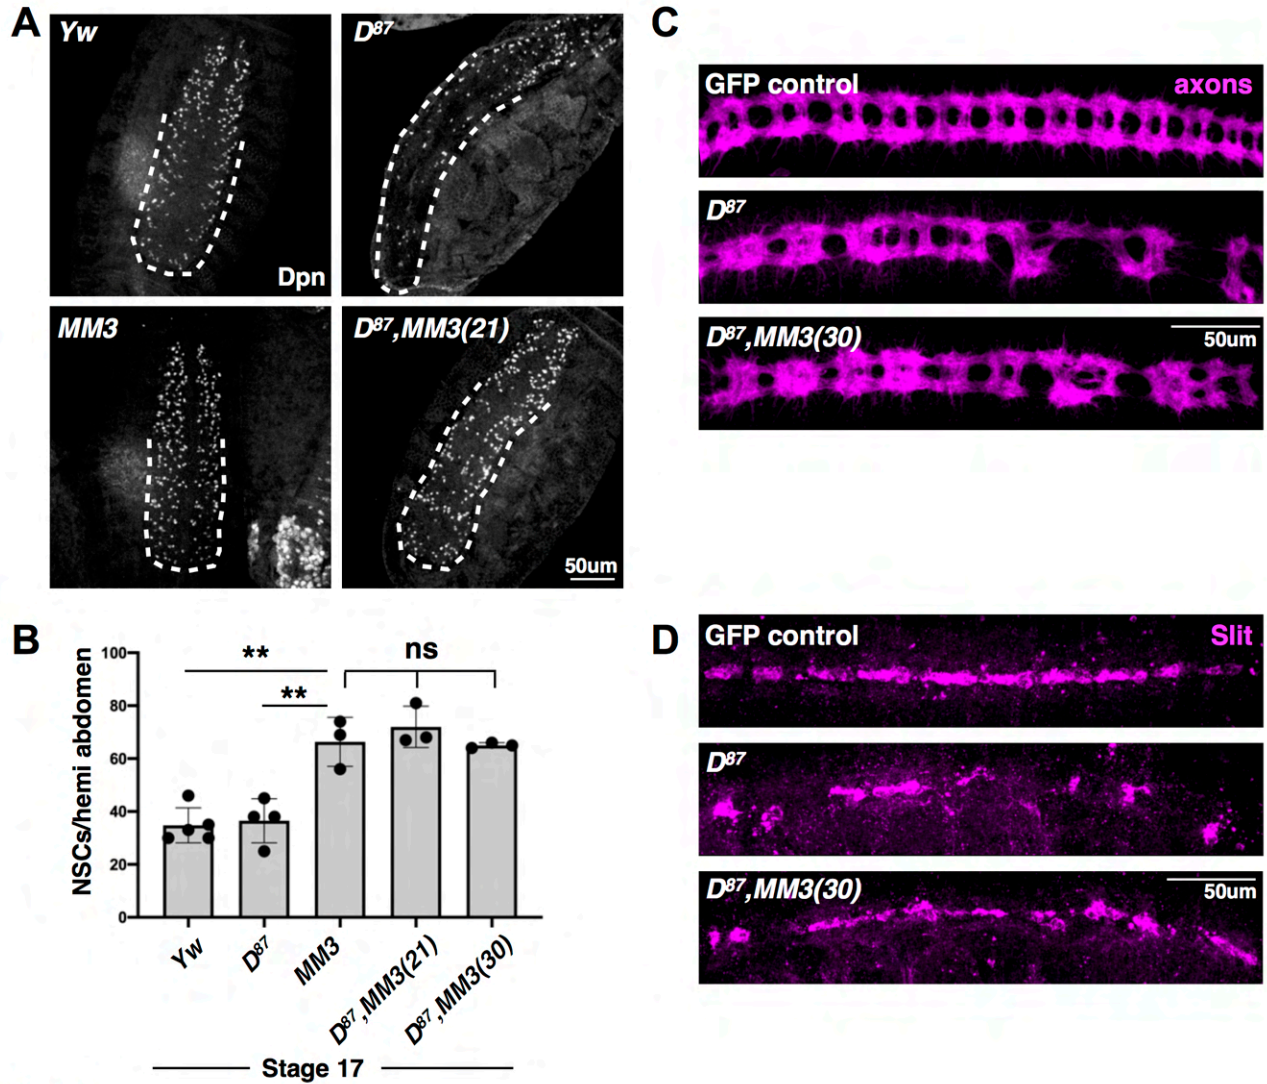

Figure 7

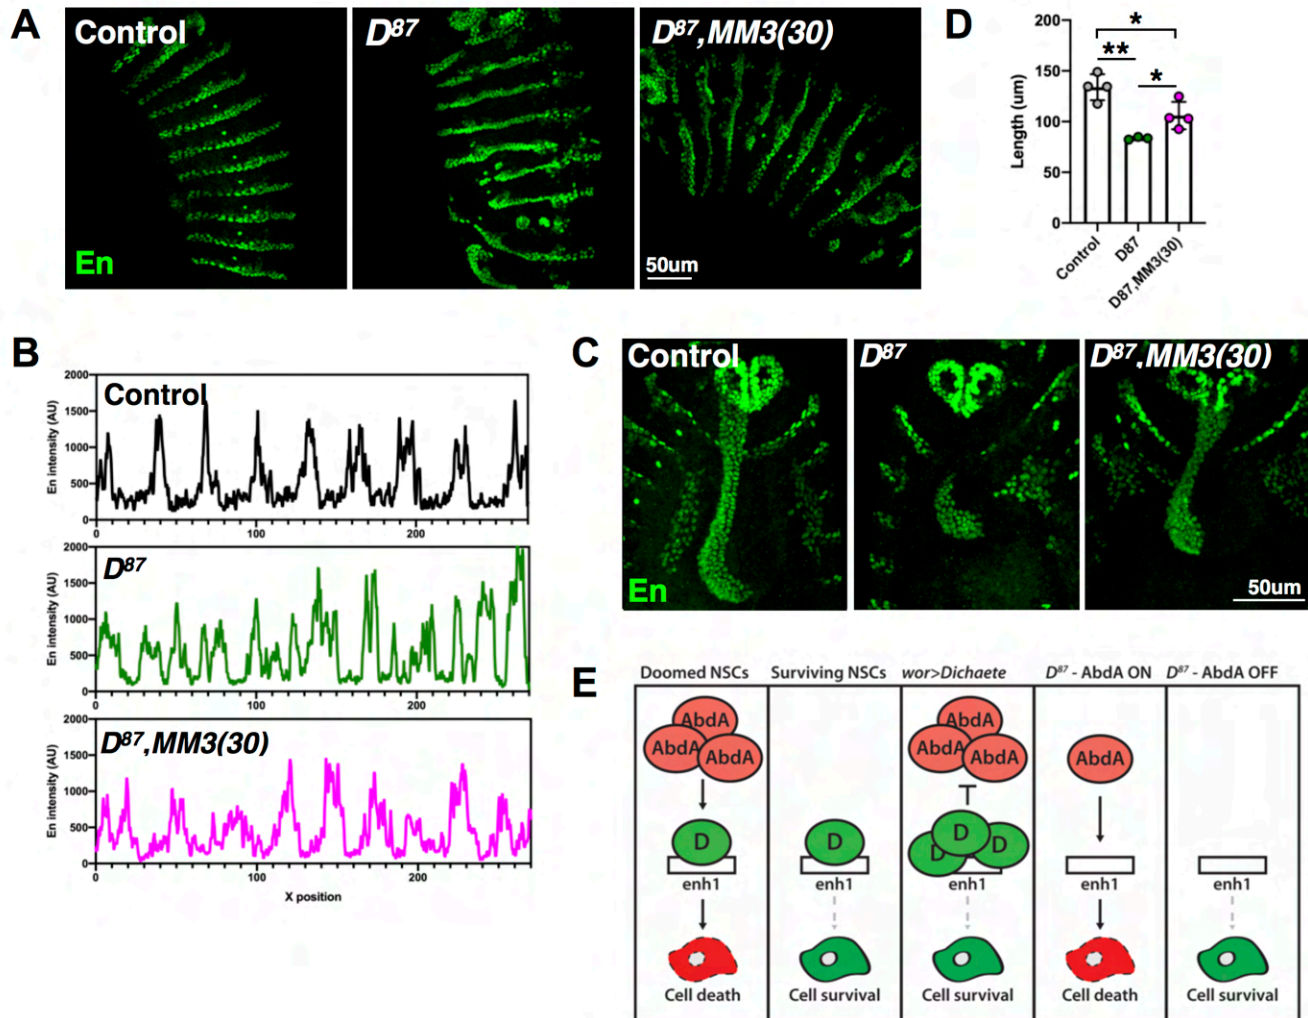

**Figure 8**

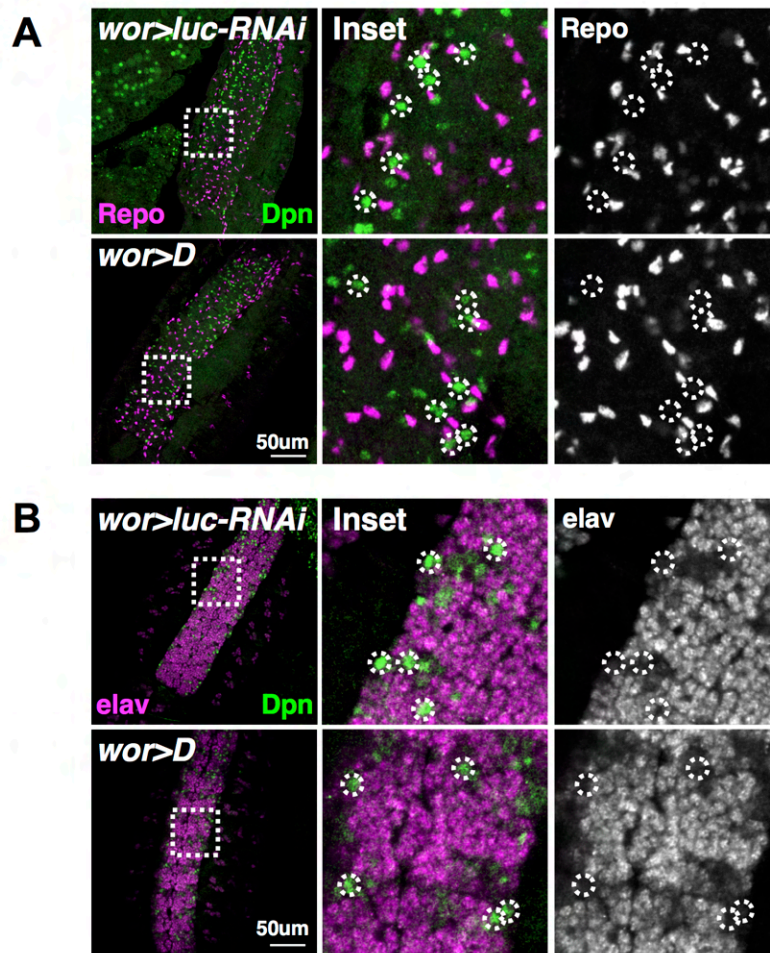

Supplemental Figure 1

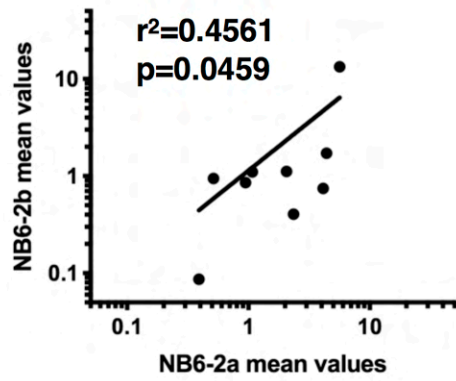

Supplemental Figure 2

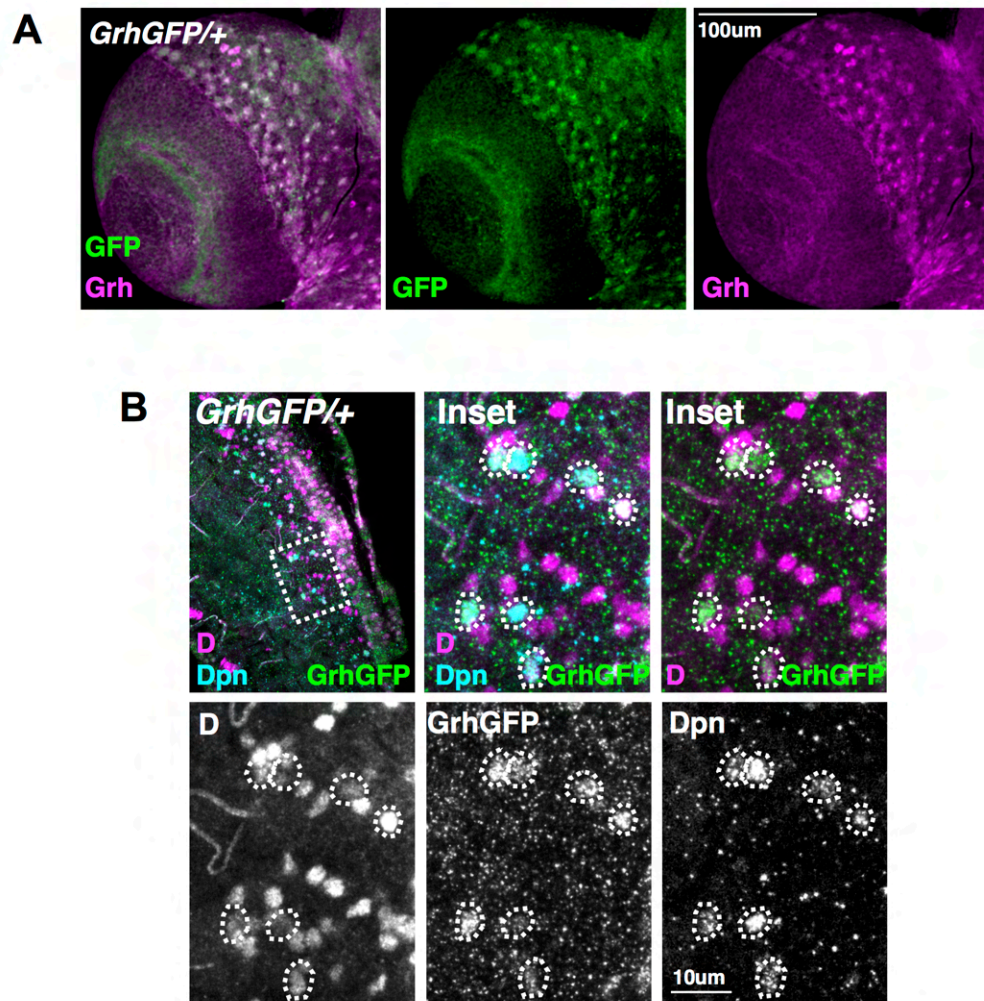

Supplemental Figure 3

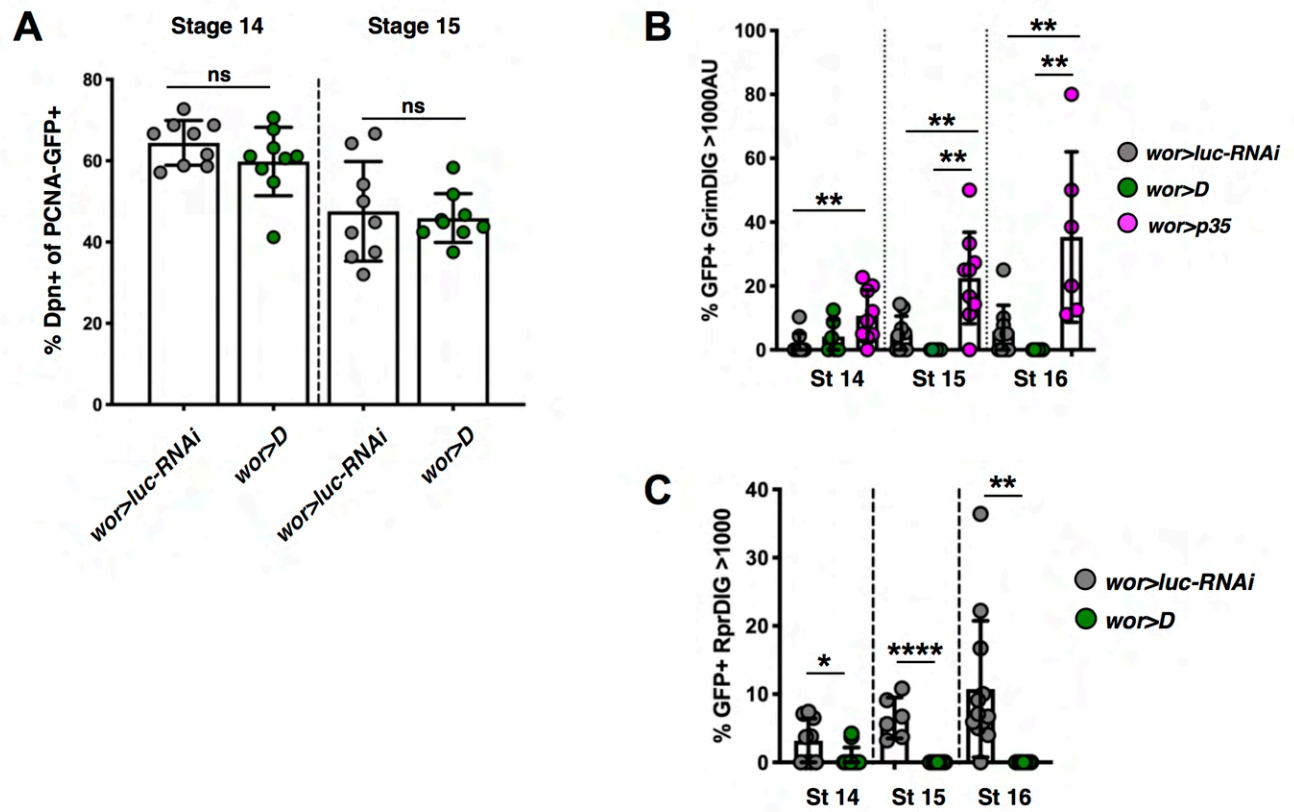

Supplemental Figure 4



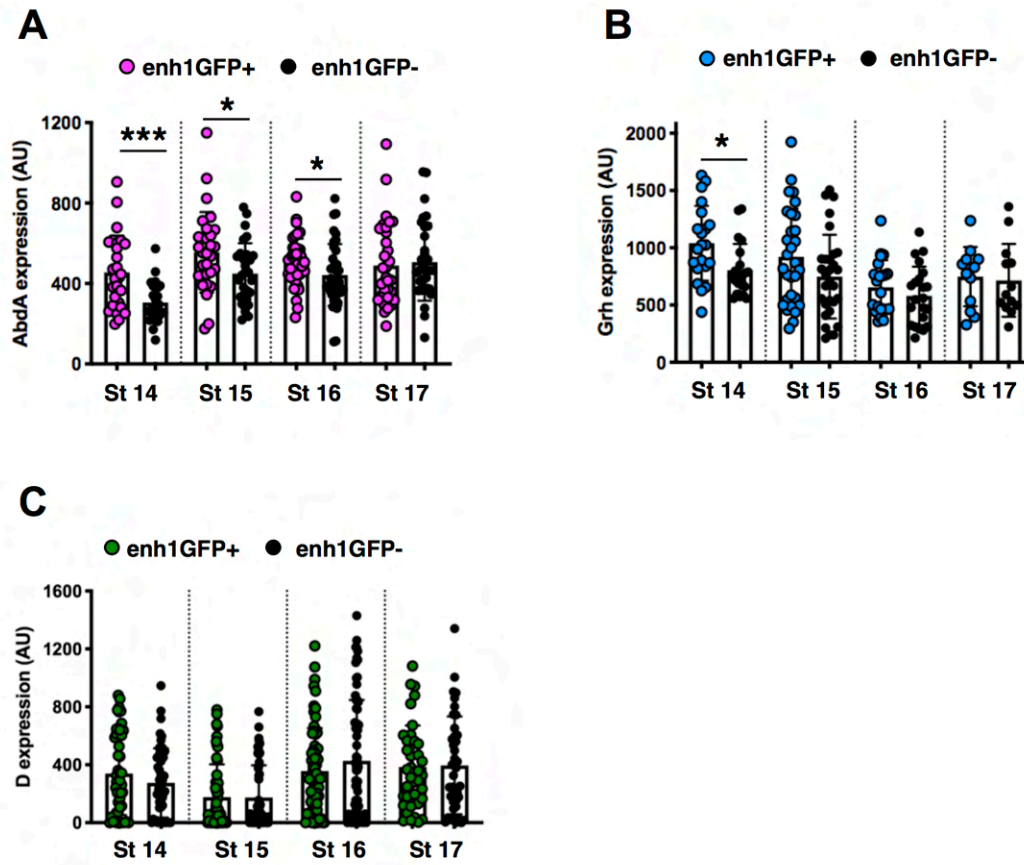

Supplemental Figure 5

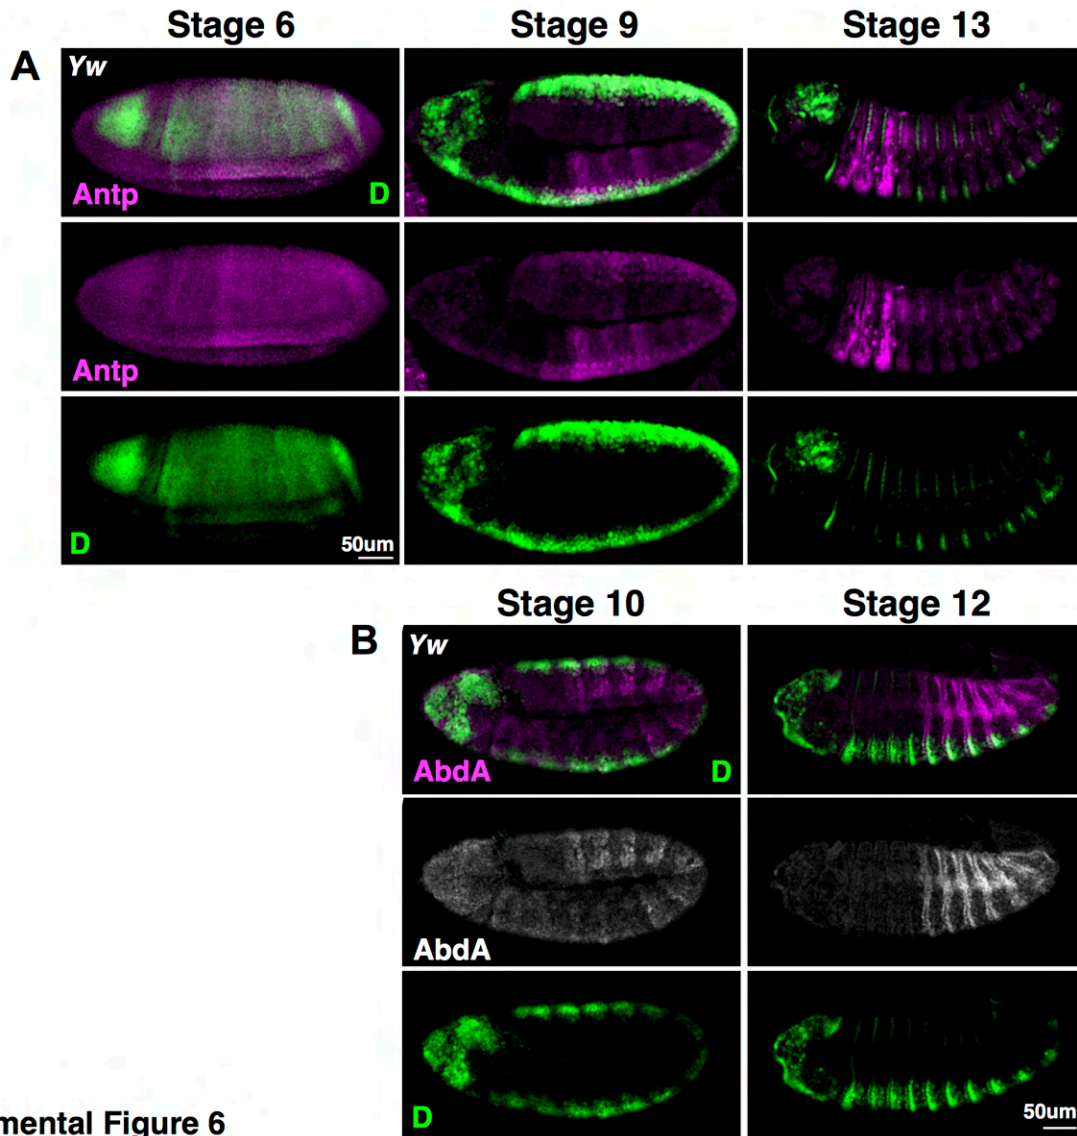

Supplemental Figure 6

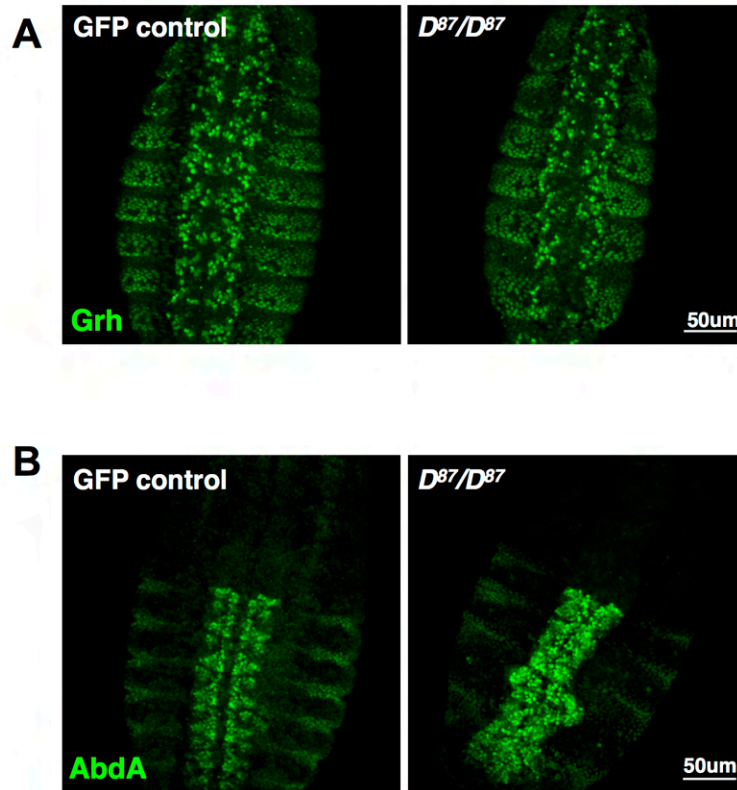

Supplemental Figure 7

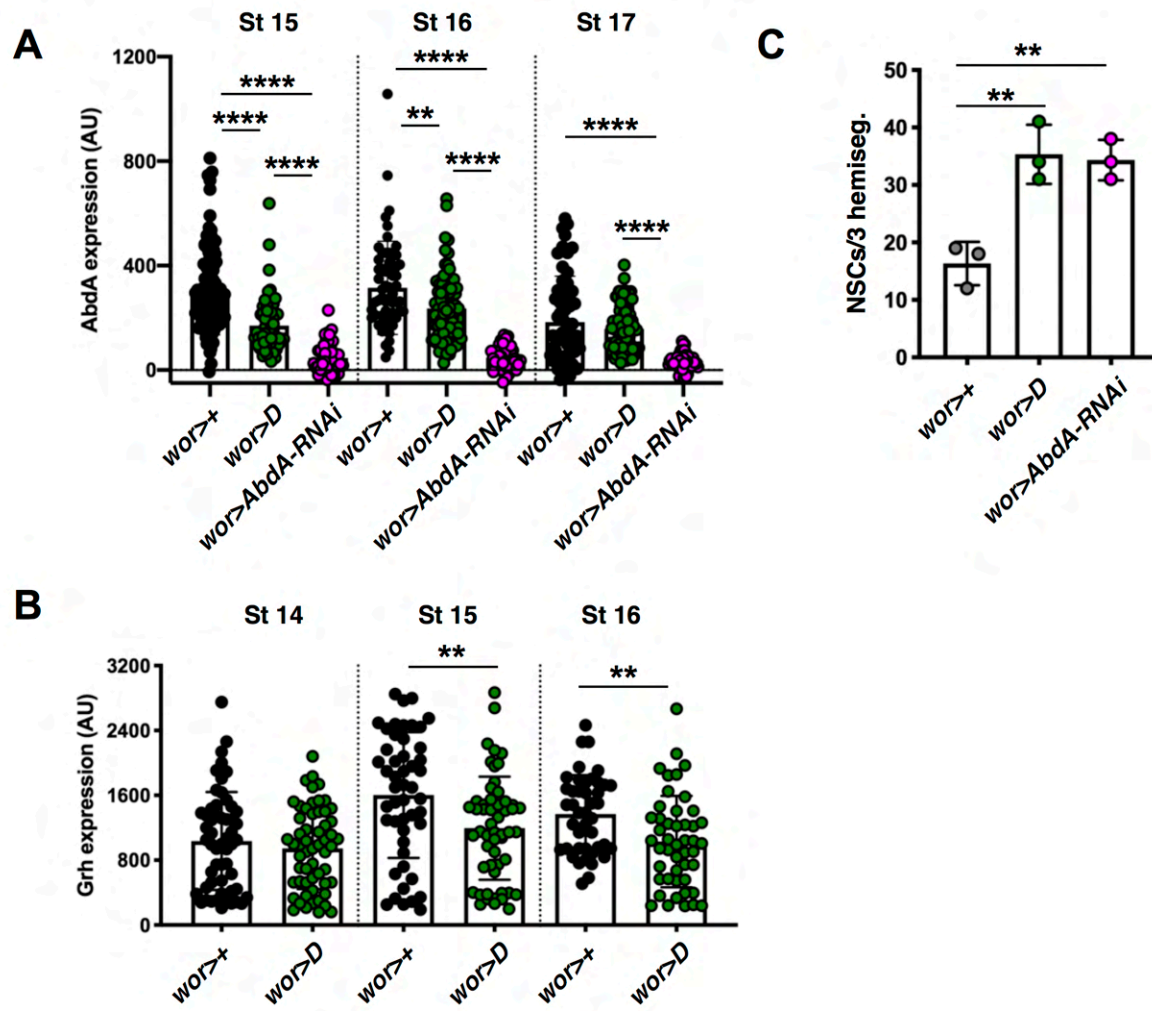

Supplemental Figure 8

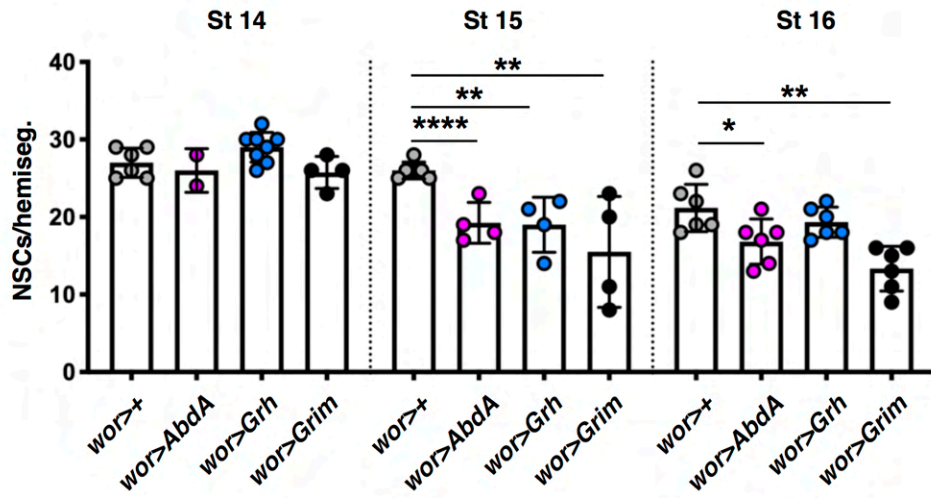

Supplemental Figure 9

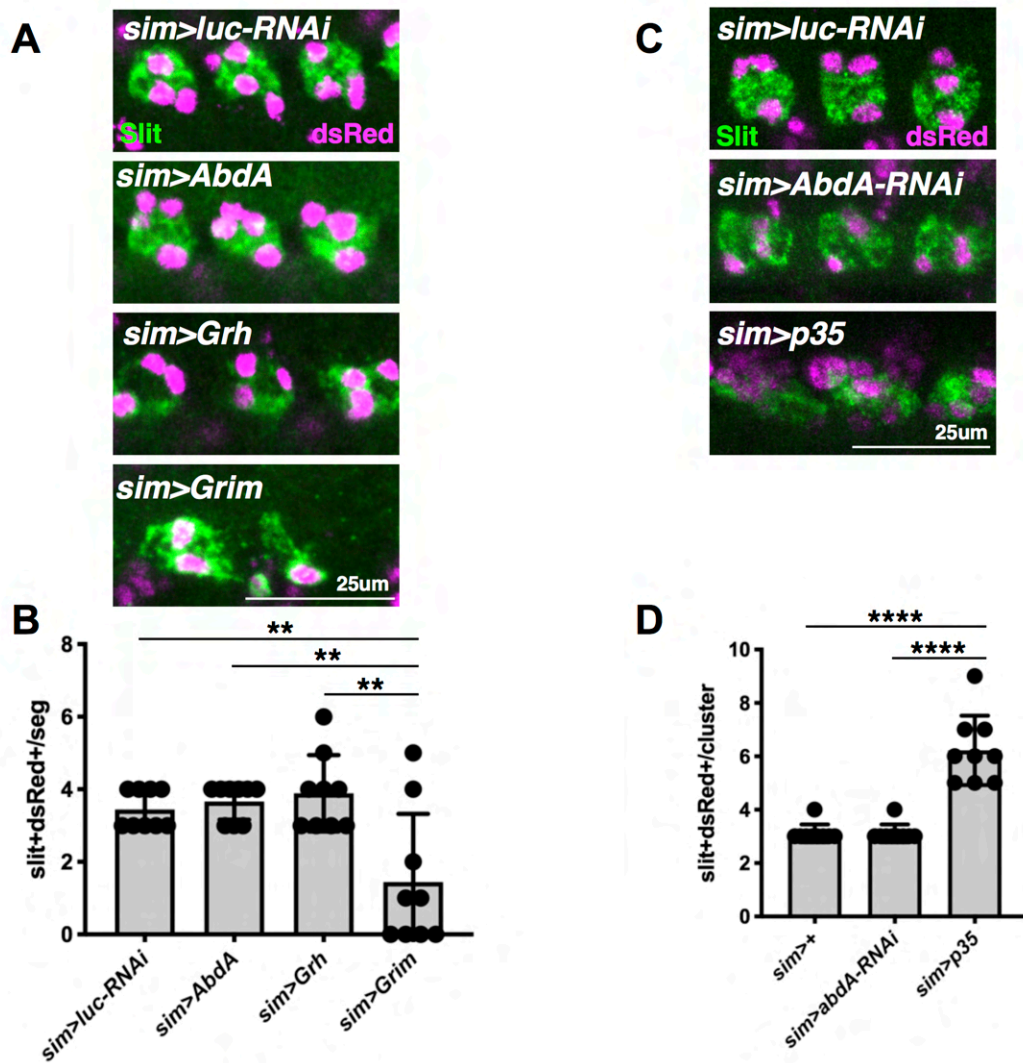

Supplemental Figure 10

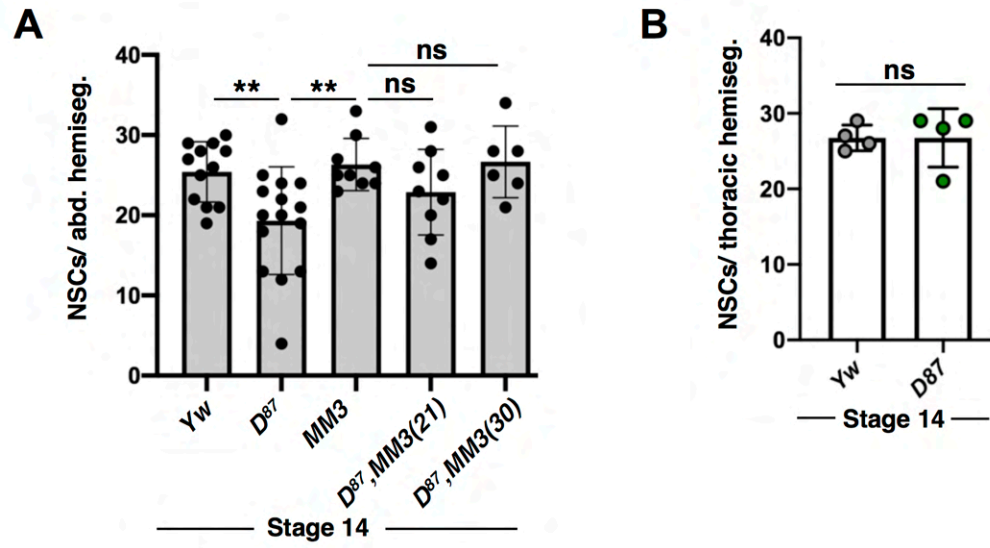

Supplemental Figure 11

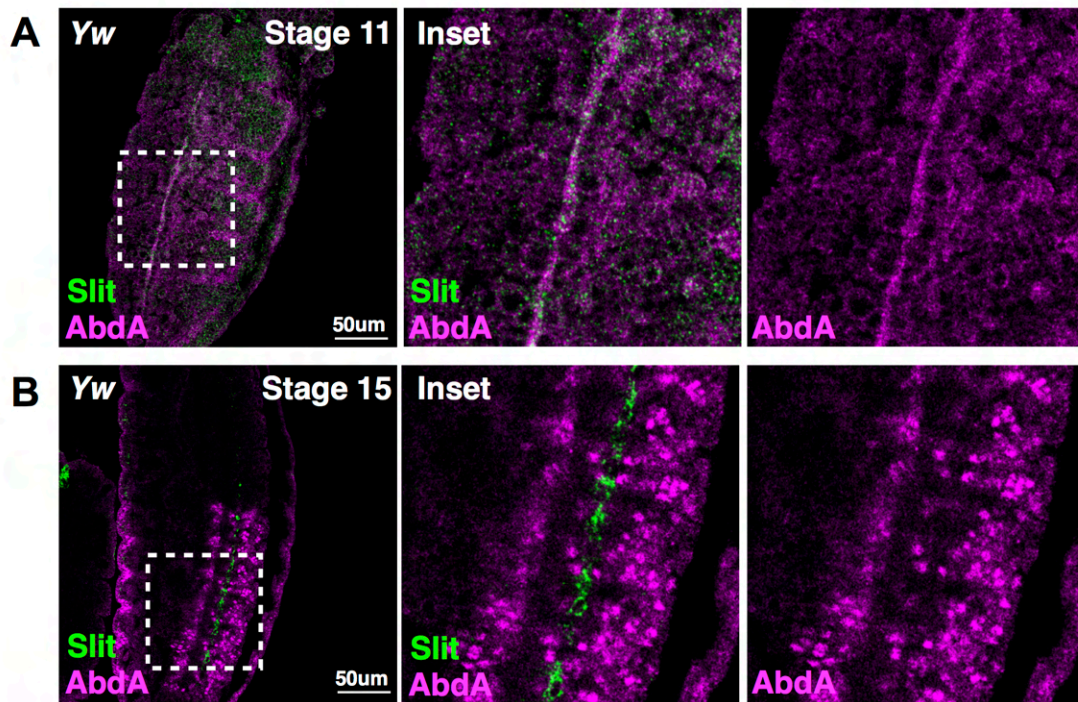

Supplemental Figure 12



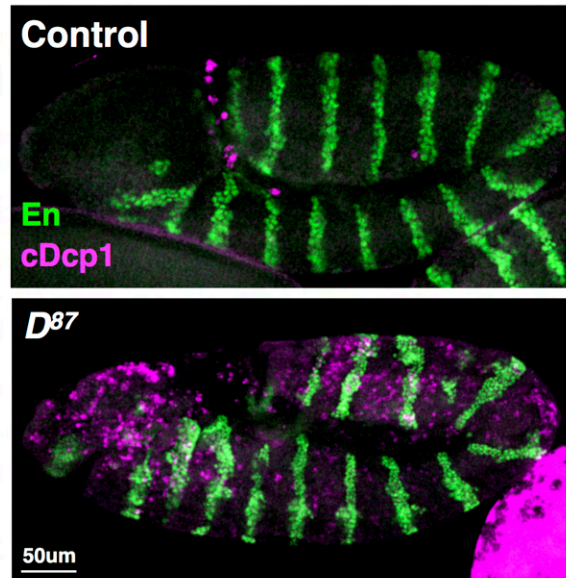

**Supplemental Figure 13**

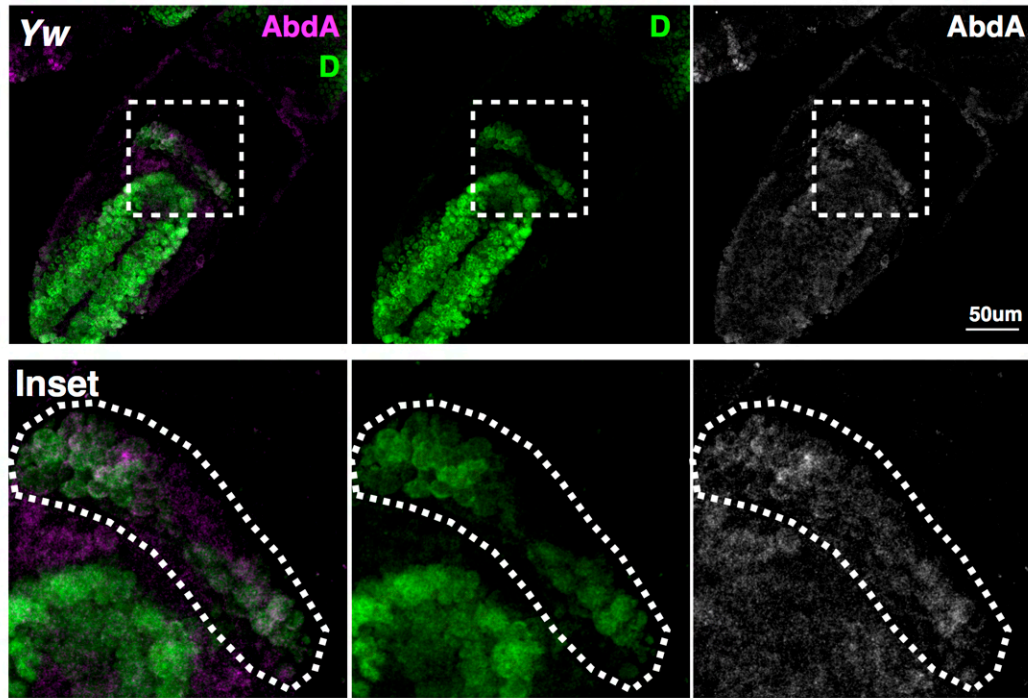

Supplemental Figure 14
